# Supplementary material
Source: PubMed Central journal article supplement (PMC5339879)
Supplement: NIHMS849706-supplement-Supporting_Information.pdf [file NIHMS849706-supplement-Supporting_Information.pdf]

## Mechanism of nucleophilic activation of (–)-lomaiviticin A

Mengzhao Xue<sup>1</sup> and Seth B. Herzon<sup>\*1,2</sup>

<sup>1</sup>Department of Chemistry, Yale University, New Haven, CT 06520 USA

<sup>2</sup>Department of Pharmacology, Yale School of Medicine, New Haven CT 06520 USA

*J. Am. Chem. Soc.*

### Supporting Information

#### Index

|                                                           |            |
|-----------------------------------------------------------|------------|
| <b>Supplementary Figures .....</b>                        | <b>S2</b>  |
| <b>General Experimental Procedures .....</b>              | <b>S4</b>  |
| <b>Chemical Materials.....</b>                            | <b>S4</b>  |
| <b>Instrumentation .....</b>                              | <b>S4</b>  |
| <b>Experimental Procedures.....</b>                       | <b>S6</b>  |
| <b>Catalog of Nuclear Magnetic Resonance Spectra.....</b> | <b>S18</b> |
| <b>Catalog of High Resolution Mass Spectra .....</b>      | <b>S39</b> |
| <b>Bibliography .....</b>                                 | <b>S43</b> |

Supplementary Figures.

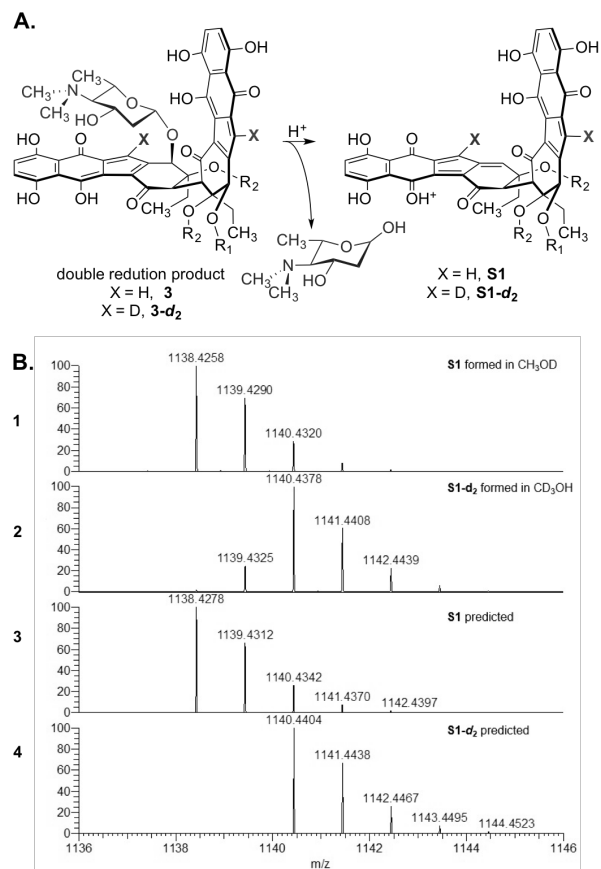

**Figure S1.** A. Ionization of **3** or **3-d<sub>2</sub>** leads to ejection of the aminosugar residue and observation of the elimination product **S1** or **S1-d<sub>2</sub>** by HRMS analysis. B. 1, 2: Selected region of the HRMS spectrum of **S1** or **S1-d<sub>2</sub>**, generated by hydrodediazotization of **1** in CH<sub>3</sub>OD or CD<sub>3</sub>OH, respectively. 3, 4: Predicted isotope distribution of **S1** and **S1-d<sub>2</sub>**, respectively. **S1**: [M]<sup>+</sup> = C<sub>60</sub>H<sub>68</sub>NO<sub>21</sub><sup>+</sup>, calculated = 1138.4278, observed = 1138.4258, error = 1.76 ppm; **S1-d<sub>2</sub>**: [M]<sup>+</sup> = C<sub>60</sub>H<sub>66</sub>D<sub>2</sub>NO<sub>21</sub><sup>+</sup>, calculated = 1140.4404, observed = 1140.4378, error = 2.28 ppm.

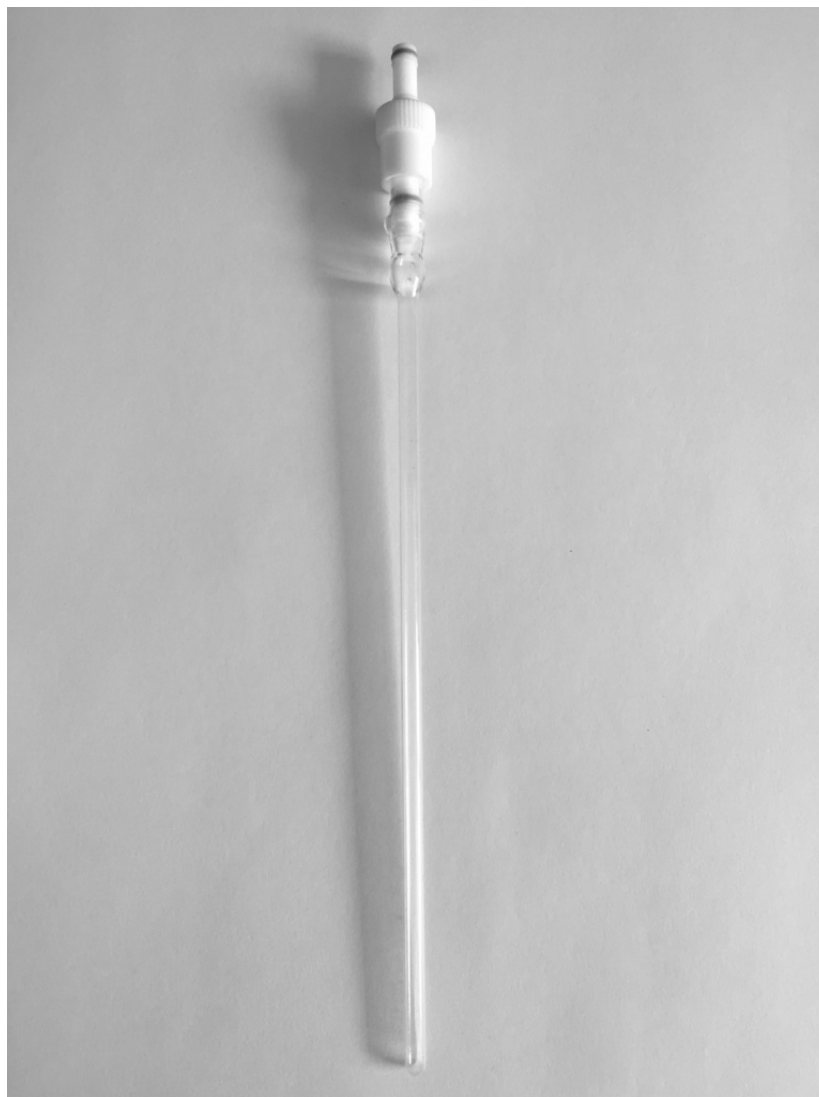

**Figure S2.** Modified 535PP 5 mm 600 MHz NMR tubes from Wilmad (Vineland, NJ) fused to CG-513 European style NMR tube valves purchased from Chemglass (Vineland, NJ) by Daryl Smith (Glassblower, Yale Chemistry Department).

**General Experimental Procedures.** All reactions were performed in single-neck, flame-dried, round-bottomed flasks fitted with rubber septa under a positive pressure of argon, unless otherwise noted. All air-free NMR experiments were conducted in 535PP 5 mm 600 MHz NMR tubes (Wilmad, Vineland, NJ) fitted with a rubber septum under argon. All NMR experiments under air were conducted in modified 535PP 5 mm 600 MHz NMR tubes (Wilmad, Vineland, NJ) fused to CG-513 European style NMR tube valves purchased from Chemglass (Vineland, NJ) by Daryl Smith (Glassblower, Yale Chemistry Department, see Figure S2). Organic solutions were concentrated by rotary evaporation (<25 °C). Liquid reagents and solvents were transferred via gastight syringe (air-free experiments) or positive-displacement pipette (experiments under air). Normal and reverse phased flash-column chromatography was performed as described by Still et al.<sup>1</sup> Normal phase purifications employed silica gel (60 Å, 40–63 µm particle size) purchased from Sorbent Technologies (Atlanta, GA). Reverse phase purifications employed C<sub>18</sub>-labeled silica gel (125 Å, 55–105 µm particle size) purchased from Waters Corporation (Milford, MA). Analytical thin-layered chromatography (TLC) was performed using glass plates pre-coated with silica gel (0.25 mm, 60 Å pore size) impregnated with a fluorescent indicator (254 nm). TLC plates were visualized by exposure to ultraviolet light (UV) and/or submersion in aqueous potassium permanganate solution (KMnO<sub>4</sub>), followed by brief heating on a hot plate (120 °C, 10–15 s).

**Chemical Materials.** Commercial solvents and reagents were used as received with the following exceptions. Triethylamine was distilled from calcium hydride under an atmosphere of nitrogen immediately before use. (–)-Lomaiviticins A (**1**) and C (**2**) were prepared according to the procedures of Herzon and co-workers.<sup>2</sup> Methanol-*d*<sub>4</sub> and acetone-*d*<sub>6</sub> employed in air-free experiments were degassed by three freeze–pump–thaw cycles, vacuum transferred, and stored under argon.

**Instrumentation.** Proton nuclear magnetic resonance spectra (<sup>1</sup>H NMR) were collected in the Yale Chemical and Biophysical Instrumentation Center (CBIC) on a 500 MHz two-channel Agilent ProPulse NMR spectrometer equipped with a gradient OneNMR probe, at 25 °C, unless otherwise noted. Data was processed using the VnmrJ 4.2A software. Chemical shifts are expressed in parts per million (ppm, δ scale) downfield from tetramethylsilane and are referenced to the residual protons in the NMR solvent (CHD<sub>2</sub>OD, 3.31; (CHD<sub>2</sub>)(CD<sub>3</sub>)CO, 2.05). Data are represented as follows: chemical shift, multiplicity (s = singlet, d = doublet, t = triplet, q = quartet, quin = quintet, m = multiplet and/or multiple resonances, br = broad, app = apparent), integration, coupling constant in Hertz, and assignment. Heteronuclear single quantum coherence spectra (HSQC) and heteronuclear multiple bond correlation spectra (HMBC) were recorded on the same instrument at –50 °C. Chemical shifts for carbon are expressed in parts per million (ppm, δ scale) downfield from tetramethylsilane and are referenced to the carbon resonance of the solvent ((CHD<sub>2</sub>)<sub>2</sub>CO, δ 206.7 and δ 29.9). Variable temperature (VT) NMR experiments employed nitrogen gas as the coolant (chilled by passing through an external sample of liquid nitrogen).

Samples were precooled to  $-80\text{ }^{\circ}\text{C}$  in a dry ice bath before introduction into the precooled instruments. NMR data were acquired immediately after the temperature stabilized. High-resolution mass spectrometry (HRMS) was obtained at the Mass Spectrometry and Proteomics Resource of the W.M. Keck Foundation Biotechnology Resource Laboratory at Yale University (New Haven, CT). All HRMS samples were prepared in 2 mL Cert High Rec vials purchased from Thermo Scientific (Rockwood, TN). UPLC/HRMS analysis was performed on a Waters nanoAcquity UPLC system equipped with a Thermo Scientific Orbitrap Elite detector, a Waters Symmetry® C<sub>18</sub> 180  $\mu\text{m}$   $\times$  20 mm trap column, and an ACQUITY UPLC PST (BEH) C<sub>18</sub> nanoACQUITY column (1.7  $\mu\text{m}$ , 75  $\mu\text{m}$   $\times$  250 mm), at 37  $^{\circ}\text{C}$ . Trapping was performed at 5  $\mu\text{L}/\text{min}$ , 97% water for 0.2 min. Samples were eluted at 300 nL/min with a linear gradient of 3%–90% acetonitrile–water over 10 min followed by 90% acetonitrile–water for an additional 4.5 min. Water and acetonitrile employed in UPLC/MS separations contained 0.1% formic acid. Mass spectra were acquired in the Orbitrap in profile mode scanning the 300–2,000 m/z range using 1 microscan, 120,000 resolution, AGC target of 1E7, and a full max ion time of 50 ms. Data was analyzed using the Thermo Xcalibur Qual Browser software (version 3.0.63). Alternatively, HRMS was obtained at the Yale West Campus (West Haven, CT) on an Agilent TOF/Q-TOF mass spectrometer equipped with an Agilent Eclipse Plus C<sub>18</sub> column (4.6  $\mu\text{m}$   $\times$  50 mm, 1.8  $\mu\text{m}$  partial size) and an Agilent 1290 LC Model pump (Santa Clara). Samples were eluted at 500  $\mu\text{L}/\text{min}$  with a linear gradient of 0%–95% acetonitrile–water over 5 min at 25  $^{\circ}\text{C}$ . Water and acetonitrile employed in UPLC/MS separations contained 0.1% formic acid. Data was analyzed using the Agilent Mass Hunter Qualitative Analysis software (Version B.07.00).

## Experiment Procedures.

Hydrodediazotization of (-)-lomaiviticin A (**1**) in methanol- $d_4$  under air (Table 1, entries 1 and 3):

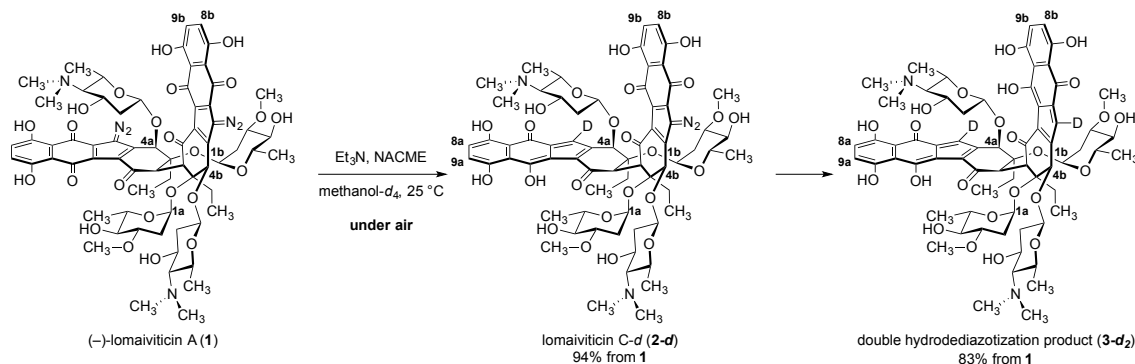

A solution of 1,4-dicyanobenzene in methanol- $d_4$  (1.56 mM, 50.0  $\mu\text{L}$ , 78.0 nmol, 0.11 equiv) was added to a solution of (-)-lomaiviticin A (**1**, 1.0 mg, 730 nmol, 1 equiv) in methanol- $d_4$  (500  $\mu\text{L}$ ) at 25 °C. A  $^1\text{H}$  NMR spectra was acquired at 25 °C <5 min after mixing. A solution of NACME in methanol- $d_4$  (586 mM, 50.0  $\mu\text{L}$ , 29.3  $\mu\text{mol}$ , 40.0 equiv) was then added. A  $^1\text{H}$  NMR spectrum (64 scans) was acquired immediately after the addition, and then subsequently every 20 min. After 22 h at 25 °C, triethylamine (4.1  $\mu\text{L}$ , 29.3  $\mu\text{mol}$ , 40.0 equiv) was added. A  $^1\text{H}$  NMR spectrum (64 scans) was acquired immediately after the addition, and then subsequently every 20 min. The yields of **1**, **2-d**, and **3-d<sub>2</sub>** were determined by integration of resolved peaks against 1,4-dicyanobenzene. Data were analyzed using Microsoft Excel and Prism 9.0.

**Table S1.** Yields of **2-d** and **3-d<sub>2</sub>** in the hydrodediazotization of **1** (methanol- $d_4$ , air).

| product                | yield based on <b>1</b> | time               |
|------------------------|-------------------------|--------------------|
| <b>2-d</b>             | 94%                     | <1 min             |
| <b>3-d<sub>2</sub></b> | 83%                     | $t_{1/2} = 49$ min |

Selected regions of the  $^1\text{H}$  NMR spectra of **1**, **2-d**, and **3-d<sub>2</sub>**.

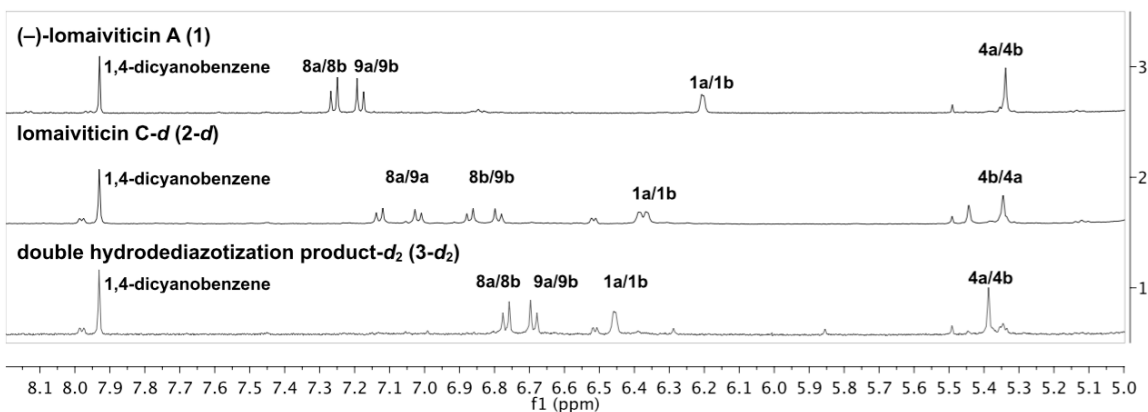

Representative NMR spectra showing the conversion of **2-d** to **3-d<sub>2</sub>**.

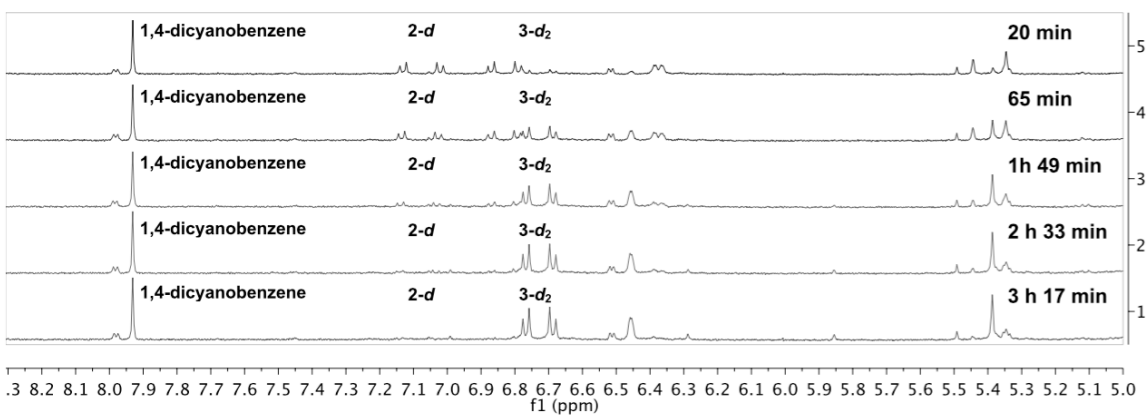

The half-life ( $t_{1/2}$ ) and pseudo first-order rate constant ( $k_{\text{obs}}$ ) for the conversion of **2-d** to **3-d**<sub>2</sub> were calculated according to the following equations:

$$\ln[A] = -kt + [A]_0$$

$$t_{1/2} = \frac{\ln(2)}{k}$$

(where  $k = k_{\text{obs}}$ )

**Table S2.** % of lomaiviticin C-d (**2-d**) in solution as a function of time (methanol-*d*<sub>4</sub>, air).

| time (min) | % <b>2-d</b> remaining | [ <b>2-d</b> ] (mM) | ln[ <b>2-d</b> ] |
|------------|------------------------|---------------------|------------------|
| 20         | 100                    | 1.1468              | 0.136975         |
| 42         | 87.86                  | 1.007578            | 0.00755          |
| 65         | 70                     | 0.80276             | -0.219699        |
| 87         | 50.71                  | 0.581542            | -0.542072        |
| 109        | 32.86                  | 0.376838            | -0.975939        |
| 131        | 20.71                  | 0.237502            | -1.437578        |
| 153        | 16.43                  | 0.188419            | -1.669086        |
| 175        | 12.14                  | 0.139222            | -1.971689        |
| 197        | 10                     | 0.11468             | -2.16561         |

[**2-d**] vs. time

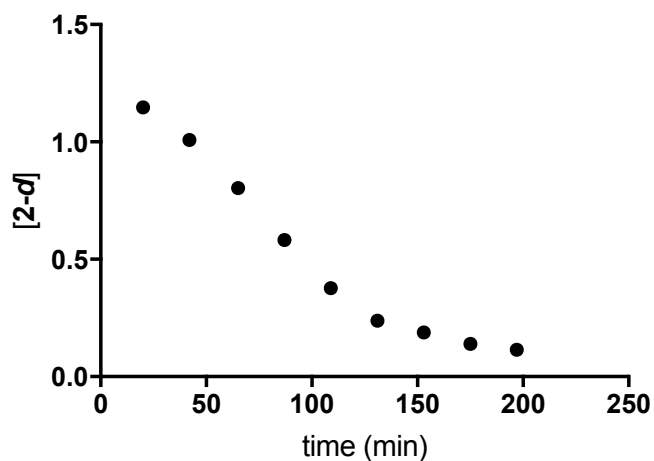



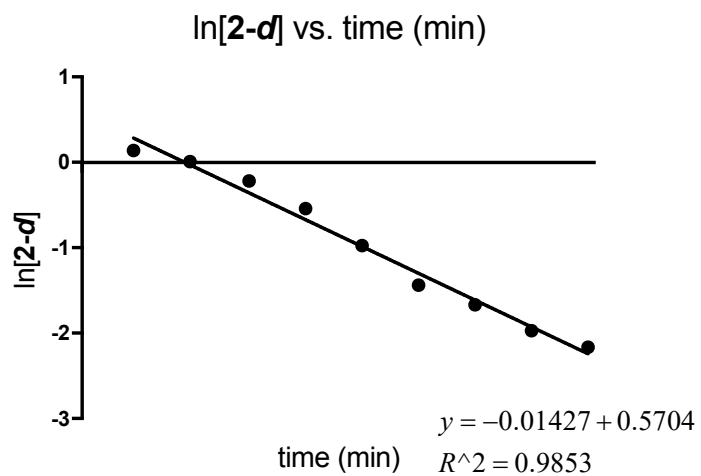

Therefore,  $k_{\text{obs}} = 0.01427 \text{ min}^{-1}$ , and  $t_{1/2} = 48.6 \text{ min}$ .

*Hydrodediazotization of (-)-lomaiviticin A (1) in methanol-d<sub>4</sub> under anaerobic conditions:*

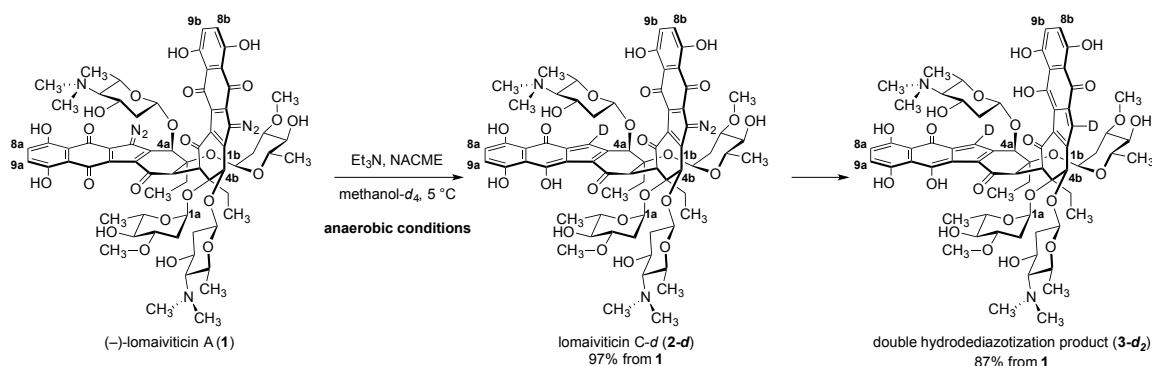

**Note:** The rate of hydrodediazotization of **2-d** under anaerobic conditions was somewhat faster than that obtained under air. Consequently, this experiment was performed at 5 °C to allow for an accurate determination of the half-life for the transformation of **2-d** to **3-d<sub>2</sub>**.

A solution of 1,4-dicyanobenzene in methanol-*d*<sub>4</sub> (7.79 mM, 20.0 μL, 155.8 nmol, 0.213 equiv) was added to a solution of (-)-lomaiviticin A (**1**, 1.0 mg, 730 nmol, 1 equiv) in methanol-*d*<sub>4</sub> (530 μL) at 25 °C. A <sup>1</sup>H NMR spectra was acquired at 5 °C <5 min after mixing. A solution of NACME and triethylamine in methanol-*d*<sub>4</sub> (586 mM in each, 50.0 μL, 29.3 μmol of each, 40.0 equiv of each) was then added and the sample was returned to the NMR instrument. A <sup>1</sup>H NMR spectrum was acquired immediately after the temperature equilibrated to 5 °C, and then subsequently every 10 min at 5 °C for 8 h until 75% of **2-d** was converted to **3-d<sub>2</sub>**. The sample was then warmed to 25 °C and a final spectrum was acquired after 5 h at 25 °C to determine the final percent conversion to **3-d<sub>2</sub>**. The yields of **1**, **2-d**, and **3-d<sub>2</sub>** were determined by integration of resolved peaks against 1,4-dicyanobenzene. Data were analyzed using Microsoft Excel and Prism 9.0.

**Table S3.** Yields of **2-d** and **3-d<sub>2</sub>** in the hydrodediazotization of **1** (methanol-*d*<sub>4</sub>, anaerobic conditions).

| product                | final yield based on <b>1</b> | time                             |
|------------------------|-------------------------------|----------------------------------|
| <b>2-d</b>             | 97%                           | <1 min                           |
| <b>3-d<sub>2</sub></b> | 87%                           | t <sub>1/2</sub> = 4.99 h (5 °C) |

**Table S4.** % of lomaiviticin C-*d* (**2-d**) in solution as a function of time (methanol-*d*<sub>4</sub>, anaerobic conditions).

| time (min) | % <b>2-d</b> remaining | [ <b>2-d</b> ] (mM) | ln[ <b>2-d</b> ] |
|------------|------------------------|---------------------|------------------|
| 10         | 100                    | 1.1802              | 0.165684         |
| 53         | 87.6543                | 1.034496            | 0.033914         |
| 110        | 80.2469                | 0.947074            | -0.05438         |
| 224        | 54.321                 | 0.641096            | -0.44458         |
| 281        | 48.1481                | 0.568244            | -0.5652          |
| 355        | 41.9753                | 0.495392            | -0.7024          |
| 413        | 39.5062                | 0.466252            | -0.76303         |
| 470        | 35.1852                | 0.415256            | -0.87886         |

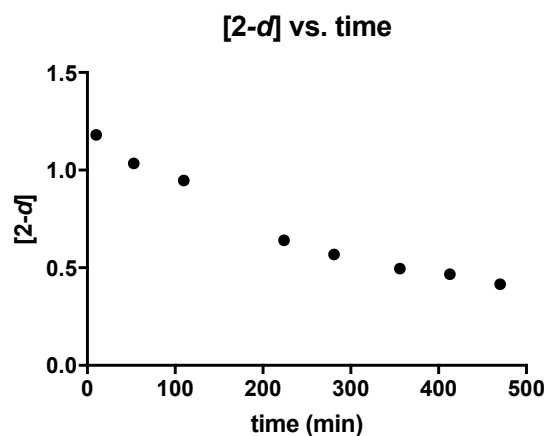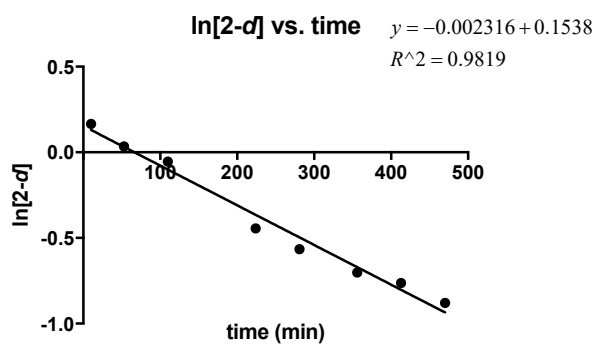

Therefore,  $k_{\text{obs}} = 0.002316 \text{ min}^{-1}$ , and  $t_{1/2} = 299 \text{ min}$  (5 h) at 5 °C.

Evaluation of the stability of (–)-lomaiviticin A (**1**) toward *N*-acetyl-L-cysteine methyl ester in methanol-*d*<sub>4</sub> under anaerobic conditions:

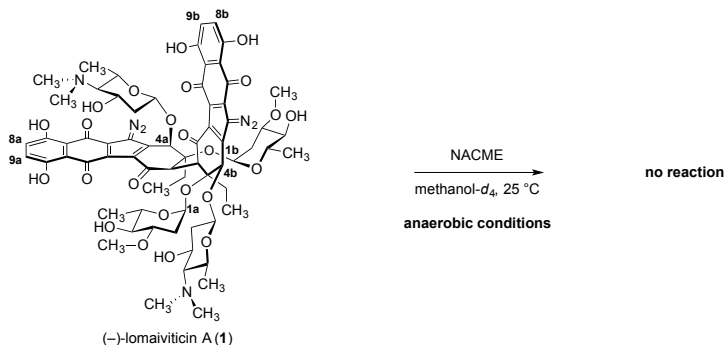

A solution of 1,4-dicyanobenzene in methanol-*d*<sub>4</sub> (7.79 mM, 20.0 μL, 155.8 nmol, 0.213 equiv) was added to a solution of (–)-lomaiviticin A (**1**, 1.0 mg, 730 nmol, 1 equiv) in methanol-*d*<sub>4</sub> (530 μL) at 25 °C. A <sup>1</sup>H NMR spectra was acquired at 25 °C <5 min after mixing. A solution of NACME in methanol-*d*<sub>4</sub> (586 mM, 50.0 μL, 29.3 μmol, 40.0 equiv) was then added. A <sup>1</sup>H NMR spectrum (64 scans) immediately acquired. The mixture was monitored by NMR spectroscopy for 8 h at 25 °C. The yields of **1** and **2-d** were determined by integration of resolved peaks against 1,4-dicyanobenzene. After 8 h at 25 °C, 94% of **1** remained; **2-d** was not detected.

*Hydrodediazotization of (-)-lomaiviticin A (1) in acetone-d<sub>6</sub> (Table 1, entries 2 and 4):*

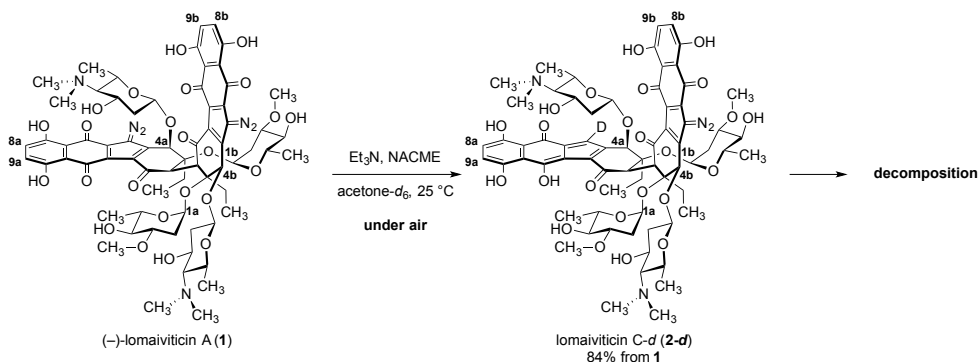

A solution of 1,4-dicyanobenzene in methanol-*d*<sub>4</sub> (1.56 mM, 50.0  $\mu$ L, 78.0 nmol, 0.11 equiv) was added to a solution of (-)-lomaiviticin A (**1**, 1.0 mg, 730 nmol, 1 equiv) in acetone-*d*<sub>6</sub> (500  $\mu$ L) at 25 °C. A <sup>1</sup>H NMR spectra was acquired at 25 °C <5 min after mixing. A solution of NACME in acetone-*d*<sub>6</sub> (586 mM, 50.0  $\mu$ L, 29.3  $\mu$ mol, 40 equiv) was then added. A <sup>1</sup>H NMR spectrum (64 scans) was acquired immediately after the addition, and then subsequently every 20 min. After 22 h at 25 °C, triethylamine (4.1  $\mu$ L, 29.3  $\mu$ mol, 40 equiv) was added. A <sup>1</sup>H NMR spectrum (64 scans) was acquired immediately after the addition, and then subsequently every 20 min for an additional 10 h. Additional <sup>1</sup>H NMR spectra were acquired at 36 h and 80 h. The yields of **1** and **2-d** were determined by integration of resolved peaks against 1,4-dicyanobenzene.

**Table S5.** Yields of **2-d** and **3-d<sub>2</sub>** in the hydrodediazotization of **1** (acetone-*d*<sub>6</sub>, air).

| product                | yield based on <b>1</b> | time   |
|------------------------|-------------------------|--------|
| <b>2-d</b>             | 84%                     | <1 min |
| <b>3-d<sub>2</sub></b> | not observed            | —      |

Selected regions of the  $^1\text{H}$  NMR spectra of **1** and **2-d**.

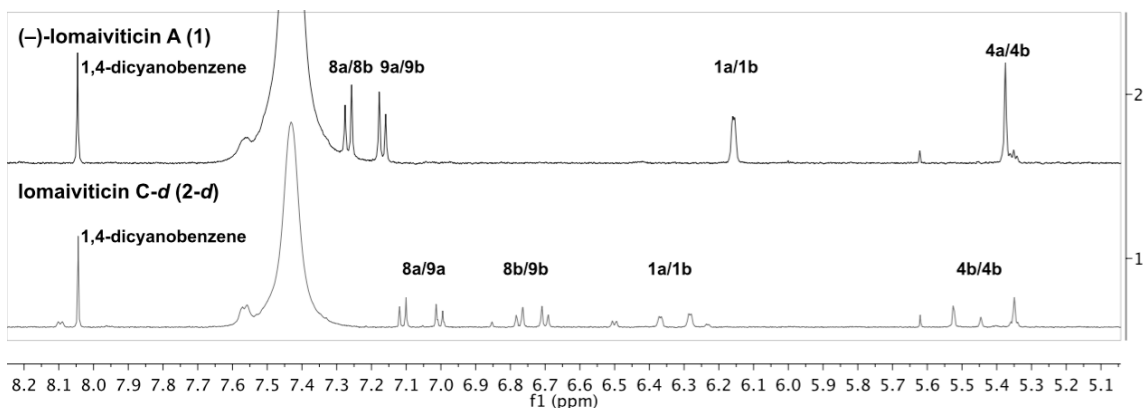

Representative NMR spectra showing the decomposition of **2-d**.

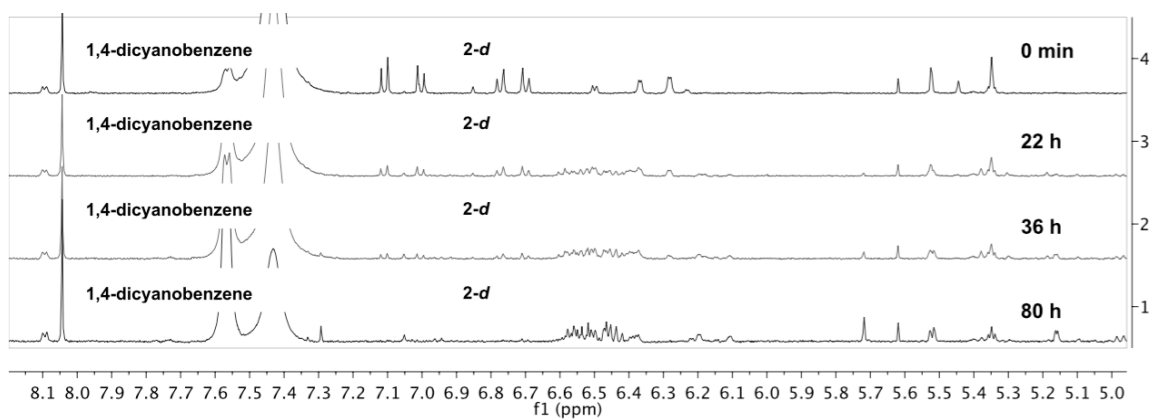

Hydrodediazotization of (–)-lomaiviticin A (**1**) in acetone-*d*<sub>6</sub> under anaerobic conditions:

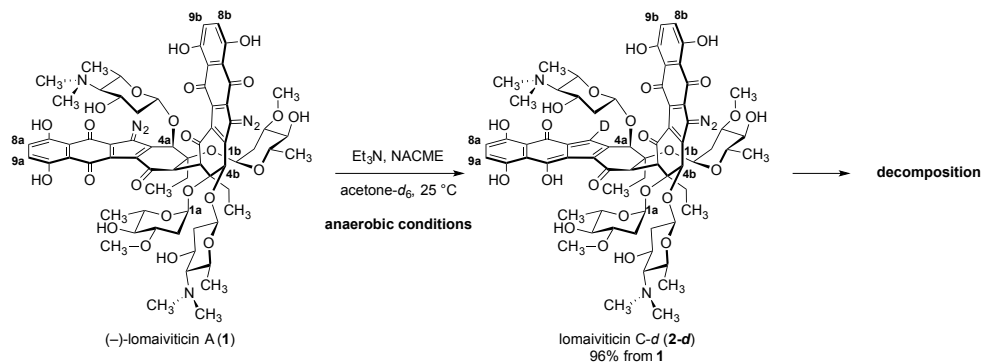

A solution of 1,4-dicyanobenzene in acetone-*d*<sub>6</sub> (7.79 mM, 20.0 μL, 155.8 nmol, 0.213 equiv) was added to a solution of (–)-lomaiviticin A (**1**, 1.0 mg, 730 nmol, 1 equiv) in acetone-*d*<sub>6</sub> (530 μL) at 25 °C. A <sup>1</sup>H NMR spectra was acquired at 25 °C <5 min after mixing. A solution of NACME and triethylamine in acetone-*d*<sub>6</sub> (586 mM in each, 50.0 μL, 29.3 μmol of each, 40.0 equiv of each) was then added. A <sup>1</sup>H NMR spectrum (64 scans) was acquired immediately after the addition at 25 °C, and then subsequently every 20 min for 12 h. Additional <sup>1</sup>H NMR spectra were acquired after 22, 31, and 46 h at 25 °C. The yields of **1** and **2-d** were determined by integration of resolved peaks against 1,4-dicyanobenzene.

**Table S6.** Yields of **2-d** and **3-d<sub>2</sub>** in the hydrodediazotization of **1** (acetone-*d*<sub>6</sub>, anaerobic conditions).

| product                | yield based on <b>1</b> | time   |
|------------------------|-------------------------|--------|
| <b>2-d</b>             | 96%                     | <1 min |
| <b>3-d<sub>2</sub></b> | not observed            | –      |

Evaluation of the stability of (-)-lomaiviticin A (**1**) toward *N*-acetyl-L-cysteine methyl ester in acetone-*d*<sub>6</sub> under anaerobic conditions:

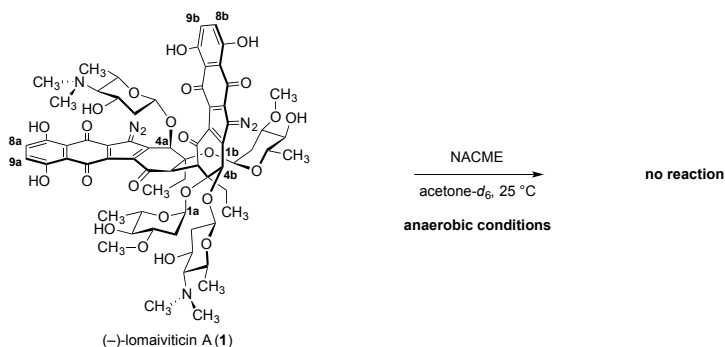

A solution of 1,4-dicyanobenzene in acetone-*d*<sub>6</sub> (7.79 mM, 20.0  $\mu$ L, 155.8 nmol, 0.213 equiv) was added to a solution of (-)-lomaiviticin A (**1**, 1.0 mg, 730 nmol, 1 equiv) in acetone-*d*<sub>6</sub> (530  $\mu$ L) at 25 °C. A <sup>1</sup>H NMR spectra was acquired at 25 °C <5 min after mixing. A solution of NACME in acetone-*d*<sub>6</sub> (586 mM, 50.0  $\mu$ L, 29.3  $\mu$ mol, 40.0 equiv) was then added. A <sup>1</sup>H NMR spectrum (64 scans) was acquired immediately after the addition at 25 °C, and then subsequently every 10 min for 8 h. A final spectrum was acquired after 12 h at 25 °C. The yields of **1** and **2-d** were determined by integration of resolved peaks against 1,4-dicyanobenzene. After 12 h at 25 °C, 92% of **1** remained; **2-d** was not detected.



Evaluation of the stability of (-)-lomaiviticin A (**1**) toward triethylamine in methanol-*d*<sub>4</sub>:

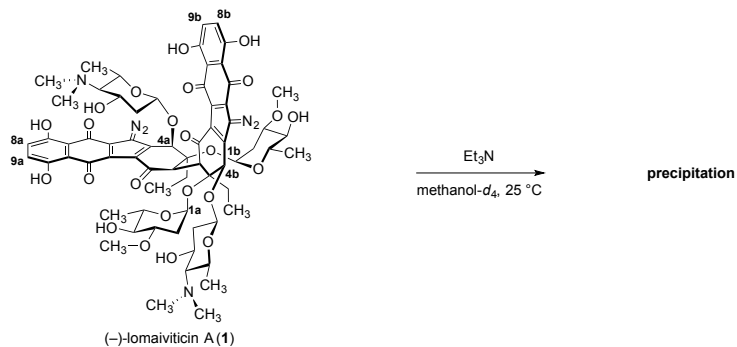

A solution of 1,4-dicyanobenzene in methanol-*d*<sub>4</sub> (1.56 mM, 50.0  $\mu$ L, 78.0 nmol, 0.11 equiv) was added to a solution of (-)-lomaiviticin A (**1**, 1.0 mg, 730 nmol, 1 equiv) in methanol-*d*<sub>4</sub> (550  $\mu$ L) at 25 °C. A <sup>1</sup>H NMR spectra was acquired at 25 °C <5 min after mixing. Triethylamine (4.1  $\mu$ L, 29.3  $\mu$ mol, 40.0 equiv) was then added. The red solution immediately turned deep blue, and formation of a precipitate was observed. A <sup>1</sup>H NMR spectrum (64 scans) was acquired immediately after the addition of base, but **1** was not detected.

Selected region of the NMR spectra before and after the addition of triethylamine:

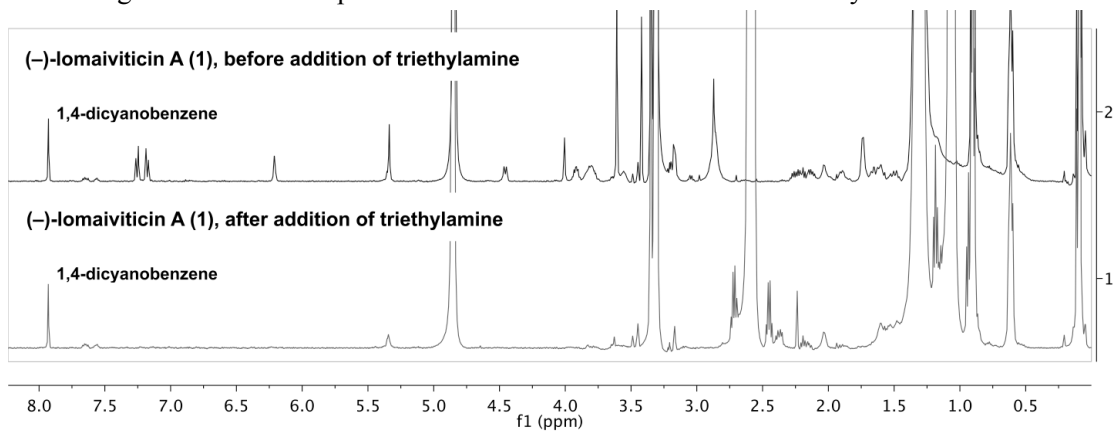

Evaluation of the stability of (-)-lomaiviticin A (**1**) toward triethylamine in acetone-*d*<sub>6</sub>:

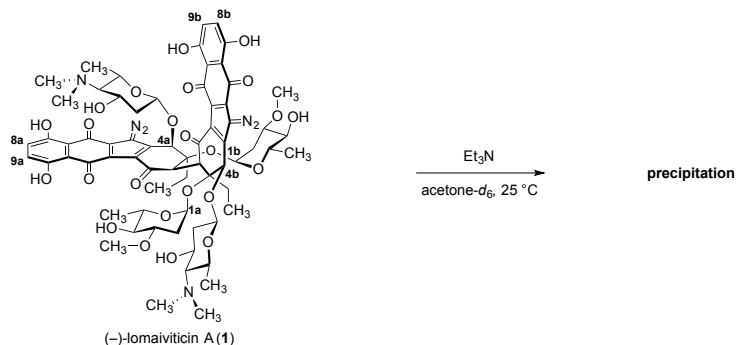

A solution of 1,4-dicyanobenzene in acetone-*d*<sub>6</sub> (1.56 mM, 50.0 μL, 78.0 nmol, 0.11 equiv) was added to a solution of (-)-lomaiviticin A (**1**, 1.0 mg, 730 nmol, 1 equiv) in acetone-*d*<sub>6</sub> (550 μL) at 25 °C. A <sup>1</sup>H NMR spectra was acquired at 25 °C <5 min after mixing. Triethylamine (4.1 μL, 29.3 μmol, 40.0 equiv) was then added. The red solution immediately turned deep blue, and formation of a precipitate was observed. A <sup>1</sup>H NMR spectrum (64 scans) was acquired immediately after the addition of base, but **1** was not detected.

Selected region of the NMR spectra before and after the addition of triethylamine:

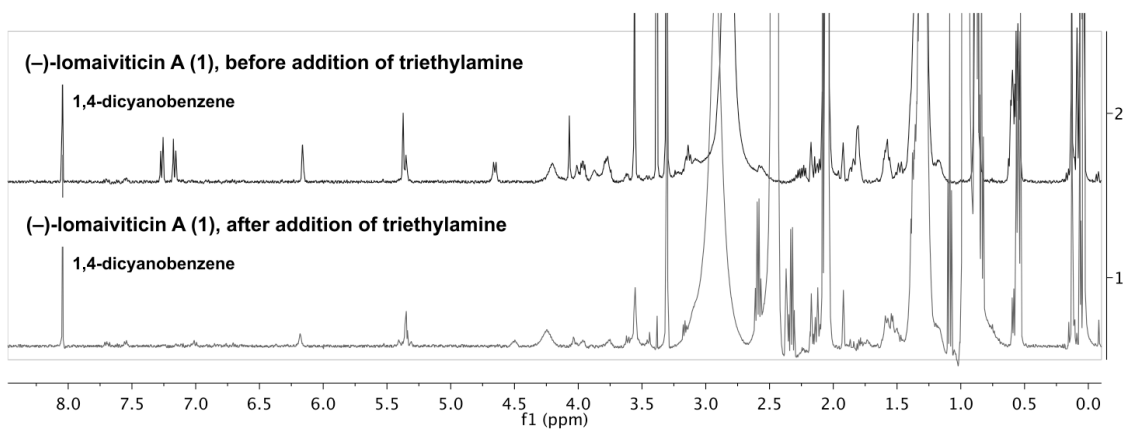

Hydrodediazotization of (–)-lomaiviticin A (**1**) in methanol (CH<sub>3</sub>OH), methanol-*d*<sub>1</sub> (CH<sub>3</sub>OD), methanol-*d*<sub>3</sub> (CD<sub>3</sub>OH), or methanol-*d*<sub>4</sub> (CD<sub>3</sub>OD).

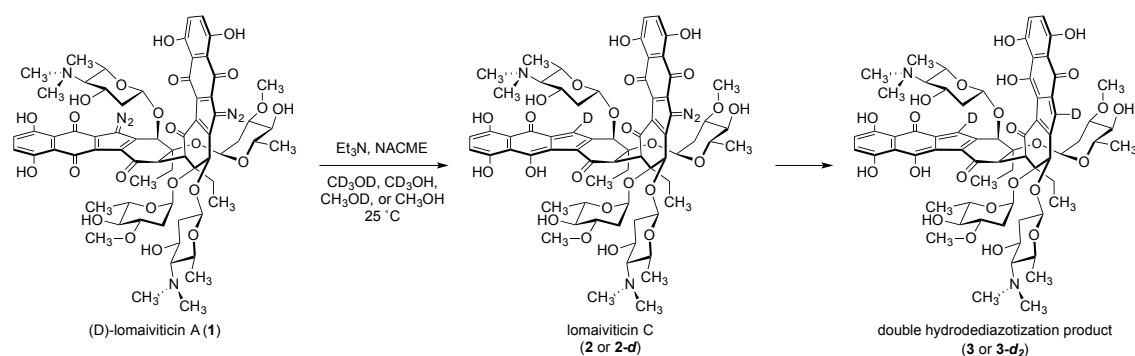

General experimental procedure:

A solution of NACME and triethylamine (81.8 μM in each component, 50.0 μL, 4.10 μmol of each, 40.0 equiv of each) in methanol (CH<sub>3</sub>OH), methanol-*d*<sub>1</sub> (CH<sub>3</sub>OD), methanol-*d*<sub>3</sub> (CD<sub>3</sub>OH), or methanol-*d*<sub>4</sub> (CD<sub>3</sub>OD) was added to a solution of (–)-lomaiviticin A (**1**, 0.14 mg, 102 nmol, 1 equiv) in the same solvent (500 μL) at 25 °C. The final volume of the reaction mixture was 550 μL, and the mixture was allowed to stand at 25 °C. After 4 d at 25 °C, an aliquot (2 μL) of the remaining reaction mixture was removed and diluted with a solution of 0.1% formic acid in water (v/v, 36 μL). The diluted solution was then analyzed by UPLC–HRMS.

The retention times of **2/2-d** and **3/3-d<sub>2</sub>** are 13.93 and 16.98 min, respectively.

**Table S7.** UPLC/HRMS analysis of the hydrodediazotization studies.

| compound               | solvent            | observed product        | observed mass | predicted mass | error in ppm |
|------------------------|--------------------|-------------------------|---------------|----------------|--------------|
| <b>2</b>               | CH <sub>3</sub> OH | <b>4</b>                | 1164.4169     | 1164.4183      | 1.20         |
| <b>2</b>               | CH <sub>3</sub> OD | <b>4</b>                | 1164.4162     | 1164.4183      | 1.80         |
| <b>2-d</b>             | CD <sub>3</sub> OH | <b>4-d</b>              | 1165.4222     | 1165.4246      | 2.06         |
| <b>2-d</b>             | CD <sub>3</sub> OD | <b>4-d</b>              | 1165.4220     | 1165.4246      | 2.23         |
| <b>3</b>               | CH <sub>3</sub> OD | <b>S1</b>               | 1138.4258     | 1138.4278      | 1.76         |
| <b>3-d<sub>2</sub></b> | CD <sub>3</sub> OH | <b>S1-d<sub>2</sub></b> | 1140.4378     | 1140.4404      | 2.28         |

Addition of benzylthiol to (–)-lomaiviticin A (**1**) under air:

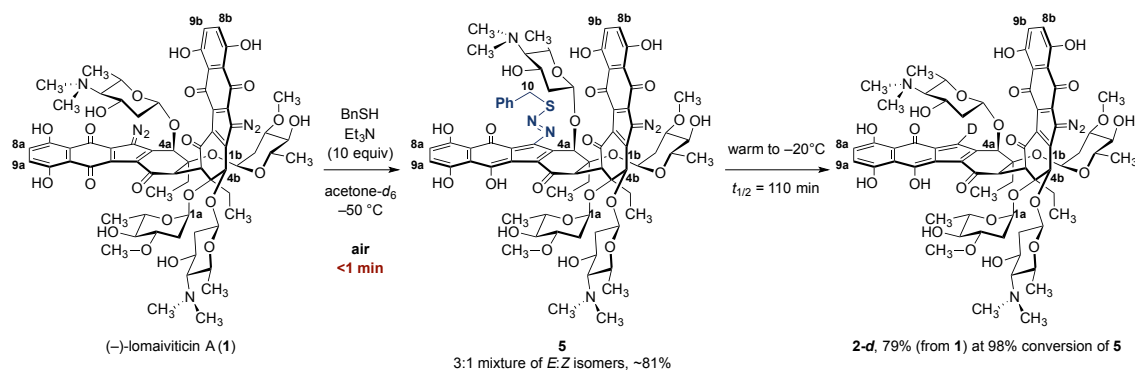

A solution of 1,4-dicyanobenzene in acetone-*d*<sub>6</sub> (1.56 mM, 50.0 μL, 78 nmol, 0.11 equiv) was added to a solution of (–)-lomaiviticin A (**1**, 1.0 mg, 730 nmol, 1 equiv) in acetone-*d*<sub>6</sub> (500 μmol) at 25 °C. The resulting mixture was cooled to –50 °C and then transferred to an NMR spectrometer that had been precooled to –50 °C. A <sup>1</sup>H NMR spectrum was then acquired. The sample was then removed from the spectrometer and cooled to –78 °C. A solution of benzylthiol and triethylamine in acetone-*d*<sub>6</sub> (146 mM in each, 50.0 μL, 7.3 μmol of each, 10.0 equiv of each) was then added to the cold sample. The sample was transferred to an NMR spectrometer that had been precooled to –50 °C, and the sample was allowed to equilibrate to –50 °C in the NMR spectrometer (<5 min). <sup>1</sup>H spectra were taken every 10 min for 1 h to monitor the isomerization of **5** (initially, 1:1 *E:Z*, equilibrating to 3:1 *E:Z*). Once a 3:1 ratio of *E:Z* isomers was achieved, no further isomerization was observed, and COSY (256 t1 increments, 8 scans per increment), and HMBC (200 t1 increments, 50 scans per t1 increment) spectra were obtained. Upon completion of the acquisition, the sample was warmed up to –20 °C, and a <sup>1</sup>H NMR spectrum was acquired every 10 min. The conversion to **2-d** was >80% complete in 4 h 40 min. After this time, the sample was warmed to 25 °C and a final <sup>1</sup>H NMR spectrum was acquired at 25 °C. The final % conversion of **5** to **2-d** was 98% after warming to 25 °C.

**Table S8.** Yields of **5** and **2-d** (acetone-*d*<sub>6</sub>, air).

| product    | yield based on <b>1</b>              | time                       |
|------------|--------------------------------------|----------------------------|
| <b>5</b>   | 81%                                  | immediate                  |
| <b>2-d</b> | 79% (at 98% conversion of <b>5</b> ) | $t_{1/2} = 110\text{ min}$ |

An HSQC spectrum of **5** was acquired under slightly modified conditions:

A solution of 1,4-dicyanobenzene in acetone-*d*<sub>6</sub> (15.6 mM, 5.0 μL, 78 nmol, 0.11 equiv) was added to a solution of (–)-lomaiviticin A (**1**, 2.0 mg, 1.46 μmol, 1 equiv) in acetone-*d*<sub>6</sub> (500 μmol)

Xue and Herzon “Mechanism of nucleophilic activation of (–)-lomaiviticin A.” *J. Am. Chem. Soc.* S20

at 25 °C. The resulting mixture was cooled to –50 °C and transferred to an NMR spectrometer that had been precooled to –50 °C. A <sup>1</sup>H NMR spectrum was then acquired. The sample was then removed from the spectrometer and cooled to –78 °C. A solution of benzylthiol and triethylamine in acetone-*d*<sub>6</sub> (146 mM in each, 20.0 μL, 2.92 μmol of each, 2.00 equiv of each) was then added to the cold sample. The sample was transferred to an NMR spectrometer that had been precooled to –50 °C, and the sample was allowed to equilibrate to –50 °C in the NMR spectrometer (<5 min). Immediately after the internal temperature reached –50 °C (<5 min), a <sup>1</sup>H spectra was taken to verify the formation of **5**, and then the sample was carefully monitored until a 3:1 ratio of *E* and *Z* isomers was formed (~ 1 h). A HSQC (200 t1 increments, 32 scans per increment) NMR spectra was then immediately acquired.

Selected regions of the  $^1\text{H}$  NMR spectra of **1**, **5**, and **2-d**.

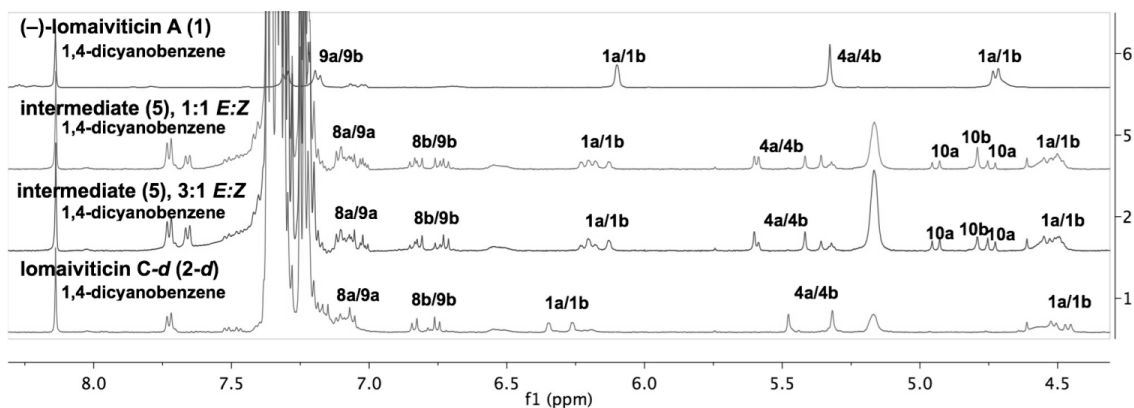

Selected regions of the  $^1\text{H}$  NMR spectra in the isomerization of **5**.

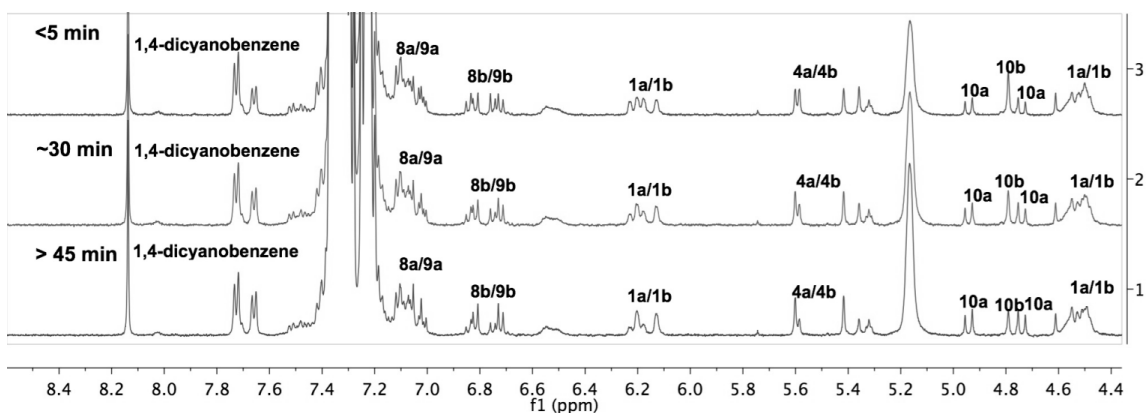

Representative NMR spectra showing the conversion of **5** to **2-d**.

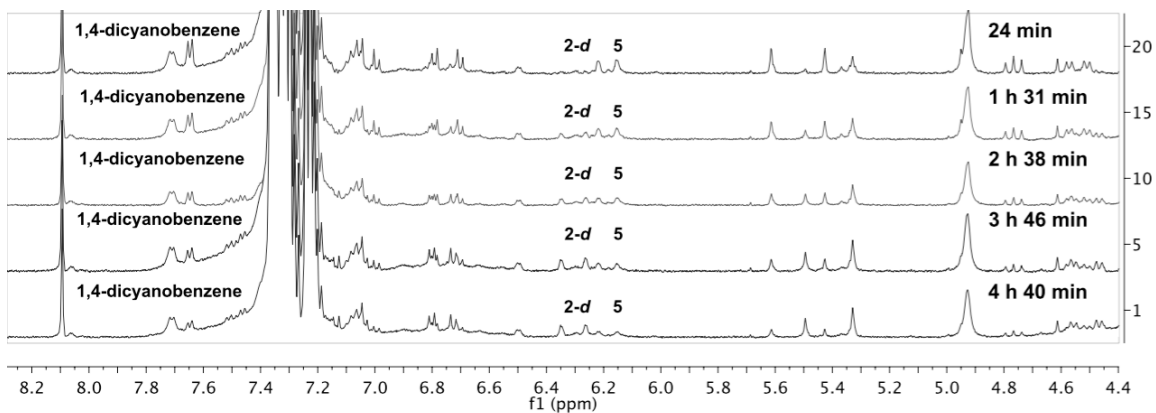

**Table S9.** % of **5** remaining in solution as a function of time (air).

| time (min) | % <b>5</b> remaining | [ <b>5</b> ] (mM) | ln[ <b>5</b> ] |
|------------|----------------------|-------------------|----------------|
| 10         | 100                  | 0.9882            | -0.011870173   |
| 24         | 83.544               | 0.82558481        | -0.191663283   |
| 51         | 73.418               | 0.725513924       | -0.320875014   |
| 64         | 68.354               | 0.675478481       | -0.392333978   |
| 77         | 64.557               | 0.637951899       | -0.449492392   |
| 91         | 58.228               | 0.575407595       | -0.552676629   |
| 118        | 53.165               | 0.525372152       | -0.643648407   |
| 185        | 32.911               | 0.32523038        | -1.123221487   |
| 199        | 30.38                | 0.300212658       | -1.203264195   |
| 226        | 25.316               | 0.250177215       | -1.385585751   |
| 252        | 20.253               | 0.200141772       | -1.608729303   |
| 266        | 18.987               | 0.187632911       | -1.673267824   |

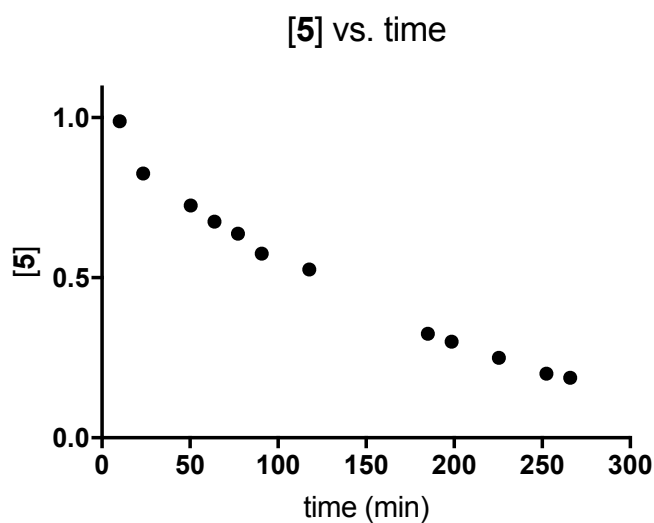

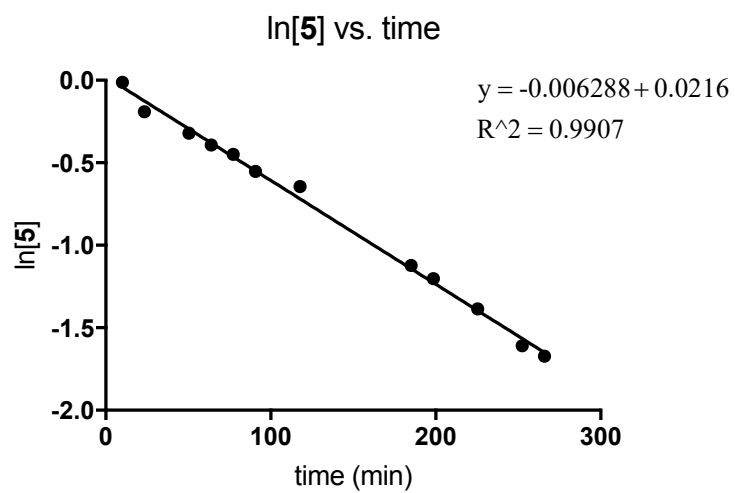

Therefore,  $k_{\text{obs}} = 0.006288 \text{ min}^{-1}$ , and  $t_{1/2} = 110 \text{ min}$ .



Addition of benzylthiol to (–)-lomaiviticin A (**1**) under anaerobic conditions:

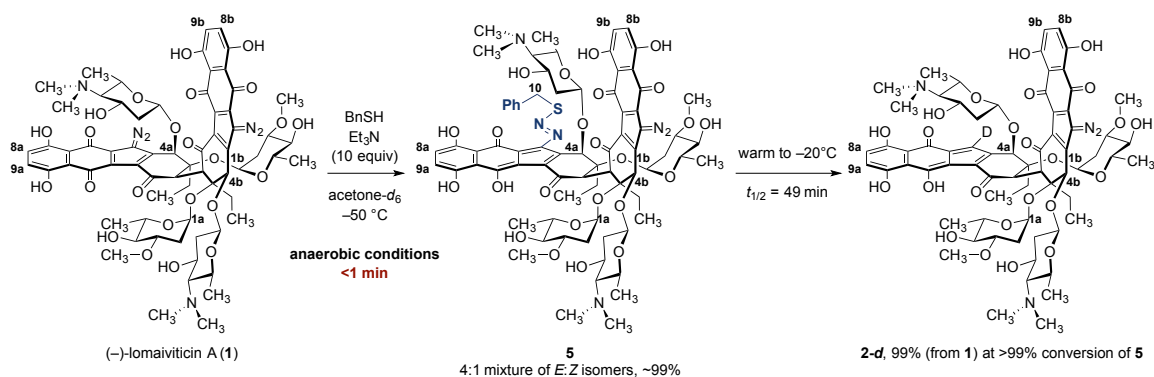

A solution of 1,4-dicyanobenzene in acetone- $d_6$  (7.79 mM, 20.0  $\mu\text{L}$ , 155.8 nmol, 0.11 equiv) was added to a solution of (–)-lomaiviticin A (**1**, 2.0 mg, 1.46  $\mu\text{mol}$ , 1 equiv) in acetone- $d_6$  (530  $\mu\text{L}$ ) at 25  $^\circ\text{C}$ , and the resulting mixture was cooled to –50  $^\circ\text{C}$  in an NMR spectrometer. A  $^1\text{H}$  NMR spectra was acquired at –50  $^\circ\text{C}$ . A solution of benzylthiol and triethylamine in acetone- $d_6$  (1.17 M in each, 12.5  $\mu\text{L}$ , 14.6  $\mu\text{mol}$  of each, 10.0 equiv of each) was then added, and the mixture was immediately cooled to –50  $^\circ\text{C}$ . Once the temperature was equilibrated at –50  $^\circ\text{C}$  (<3 min), a  $^1\text{H}$  NMR spectrum (64 scans) was acquired. Additional  $^1\text{H}$  NMR spectra were acquired every 10 min for 5 h to monitor the isomerization and stability of **5** at –50  $^\circ\text{C}$  (initially, 1:1 *E:Z*, equilibrating to 4:1 *E:Z*). Once a 4:1 ratio of *E:Z* isomers was achieved, and no further reaction was observed, the sample was warmed to –20  $^\circ\text{C}$ , and a  $^1\text{H}$  NMR spectrum was acquired every 10 min for 8 h. The conversion to **2-d** was >75% complete within 2 h. After this time, the sample was warmed to 25  $^\circ\text{C}$  and a final  $^1\text{H}$  NMR spectrum was acquired at 25  $^\circ\text{C}$ . The final % conversion of **5** to **2-d** was >99% after warming to 25  $^\circ\text{C}$ .

**Table S10.** Yields of **5** and **2-d** (acetone- $d_6$ , anaerobic conditions).

| product    | yield based on <b>1</b> | time                      |
|------------|-------------------------|---------------------------|
| <b>5</b>   | >99%                    | immediate                 |
| <b>2-d</b> | >99%                    | $t_{1/2} = 49\text{ min}$ |

**Table S11.** % of **5** remaining in solution as a function of time (anaerobic conditions).

| time (min)  | % <b>5</b> remaining | [ <b>5</b> ] (mM) | ln[ <b>5</b> ] |
|-------------|----------------------|-------------------|----------------|
| 26.93333333 | 87.27272727          | 2.376             | 0.865418402    |
| 43.86666667 | 72.72727273          | 1.98              | 0.683096845    |
| 60.79983333 | 62.72727273          | 1.70775           | 0.535176715    |
| 77.73316667 | 50                   | 1.36125           | 0.308403395    |
| 94.6665     | 35.45454545          | 0.96525           | -0.035368144   |
| 111.5998333 | 28.18181818          | 0.76725           | -0.264942585   |
| 128.5331667 | 23.63636364          | 0.6435            | -0.440833252   |
| 145.4665    | 16.36363636          | 0.4455            | -0.808558032   |

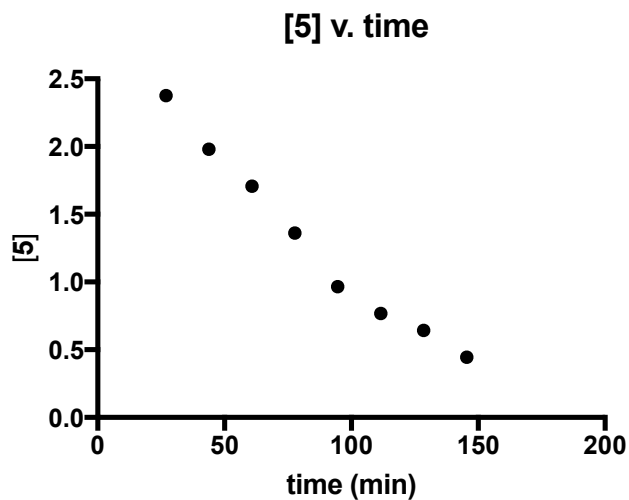

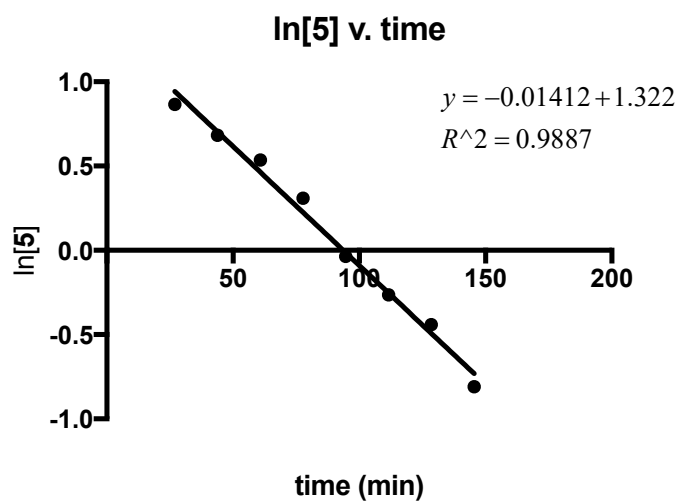

Therefore,  $k_{\text{obs}} = 0.01412 \text{ min}^{-1}$ , and  $t_{1/2} = 49 \text{ min}$ .

## Catalog of Nuclear Magnetic Resonance Spectra.

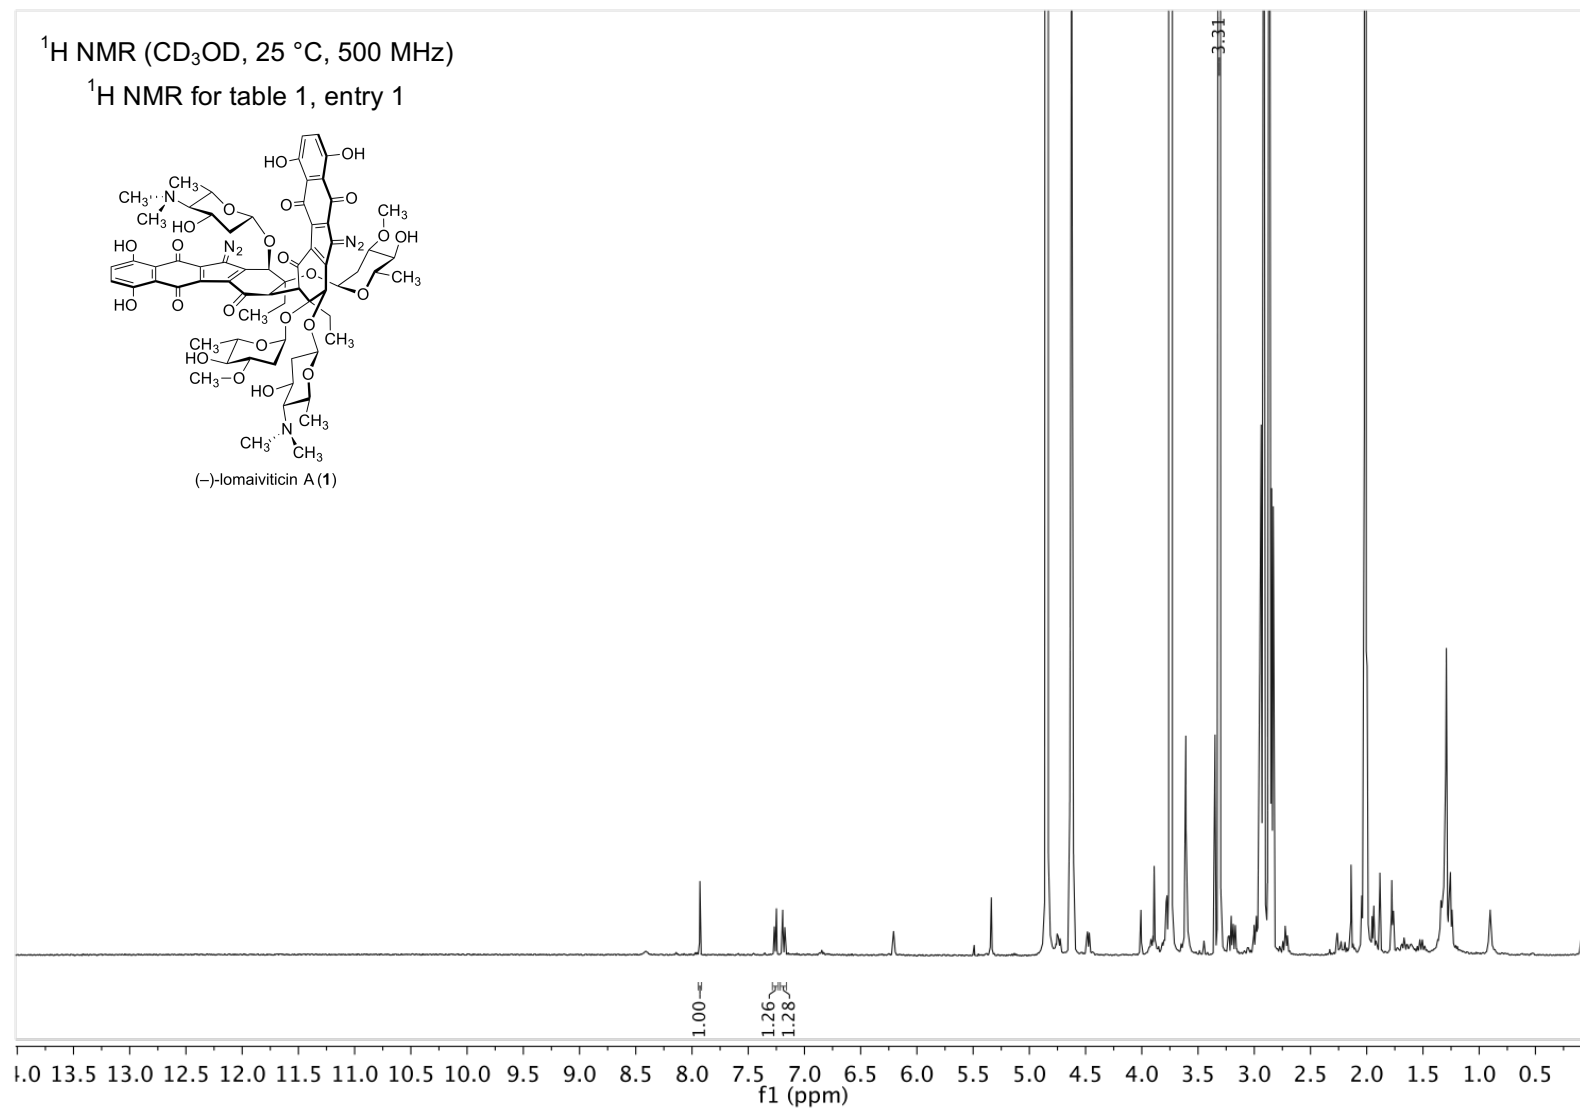

<sup>1</sup>H NMR (CD<sub>3</sub>OD, 25 °C, 500 MHz)

<sup>1</sup>H NMR for table 1, entry 1

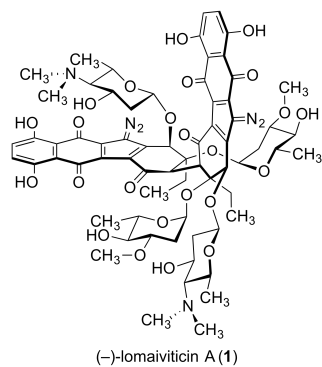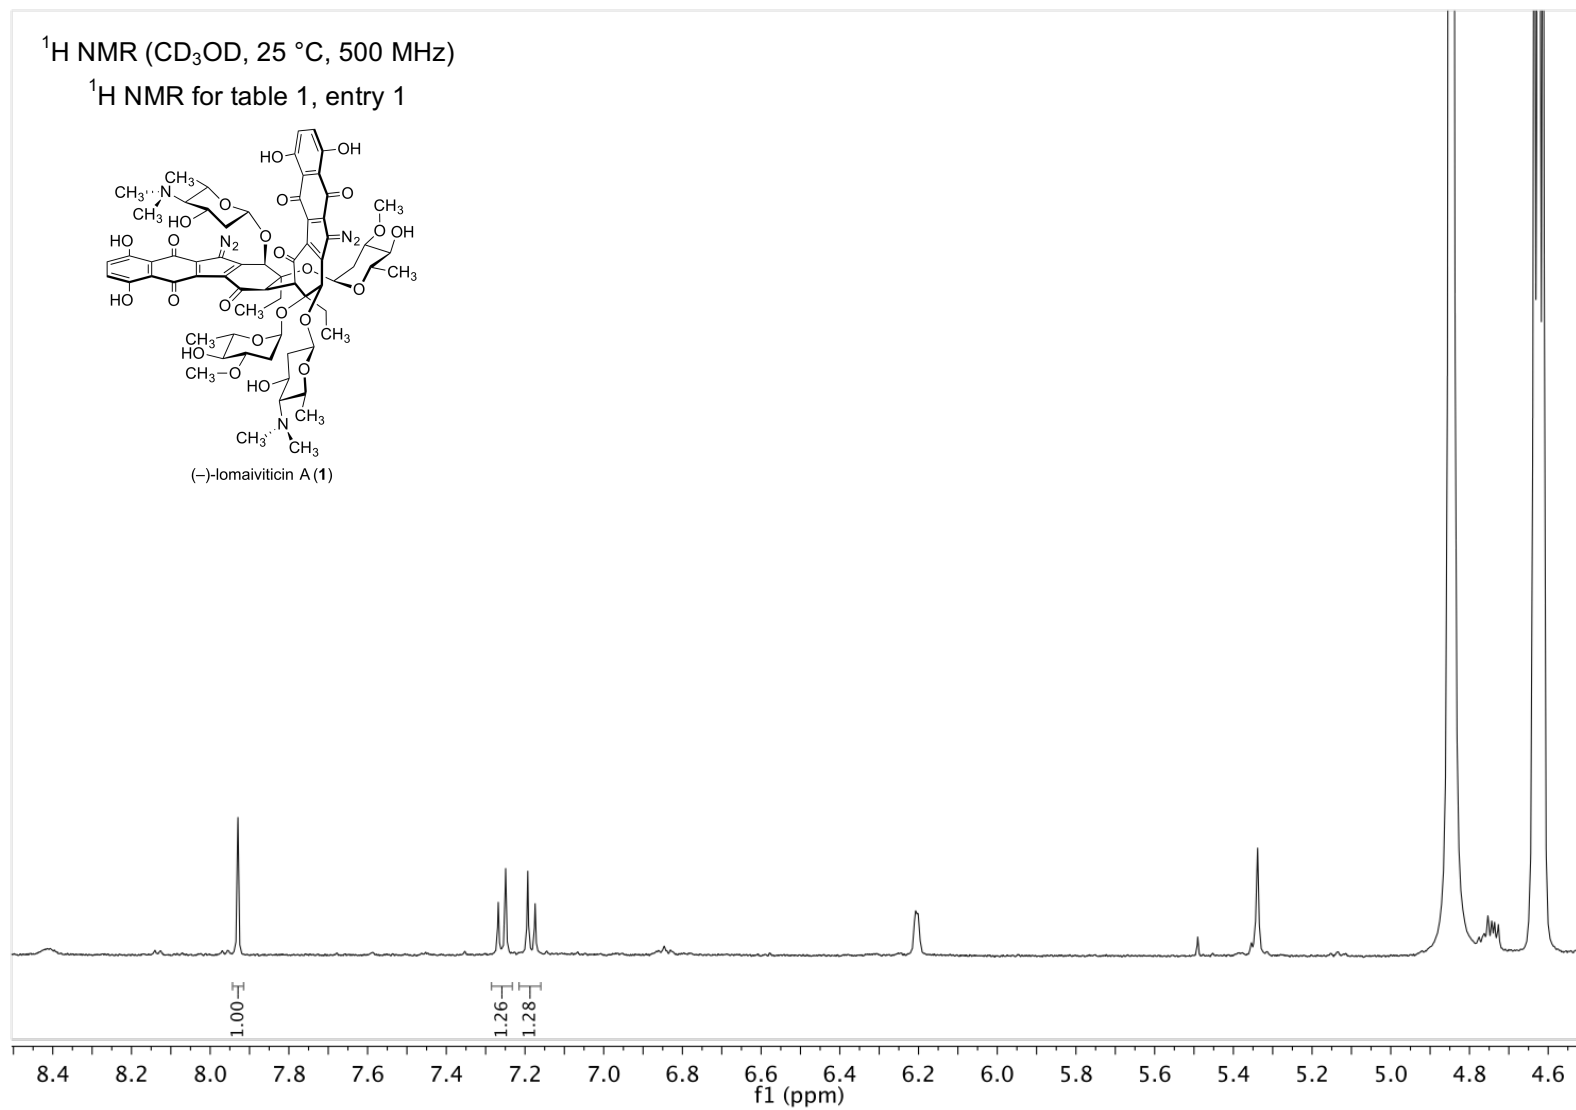

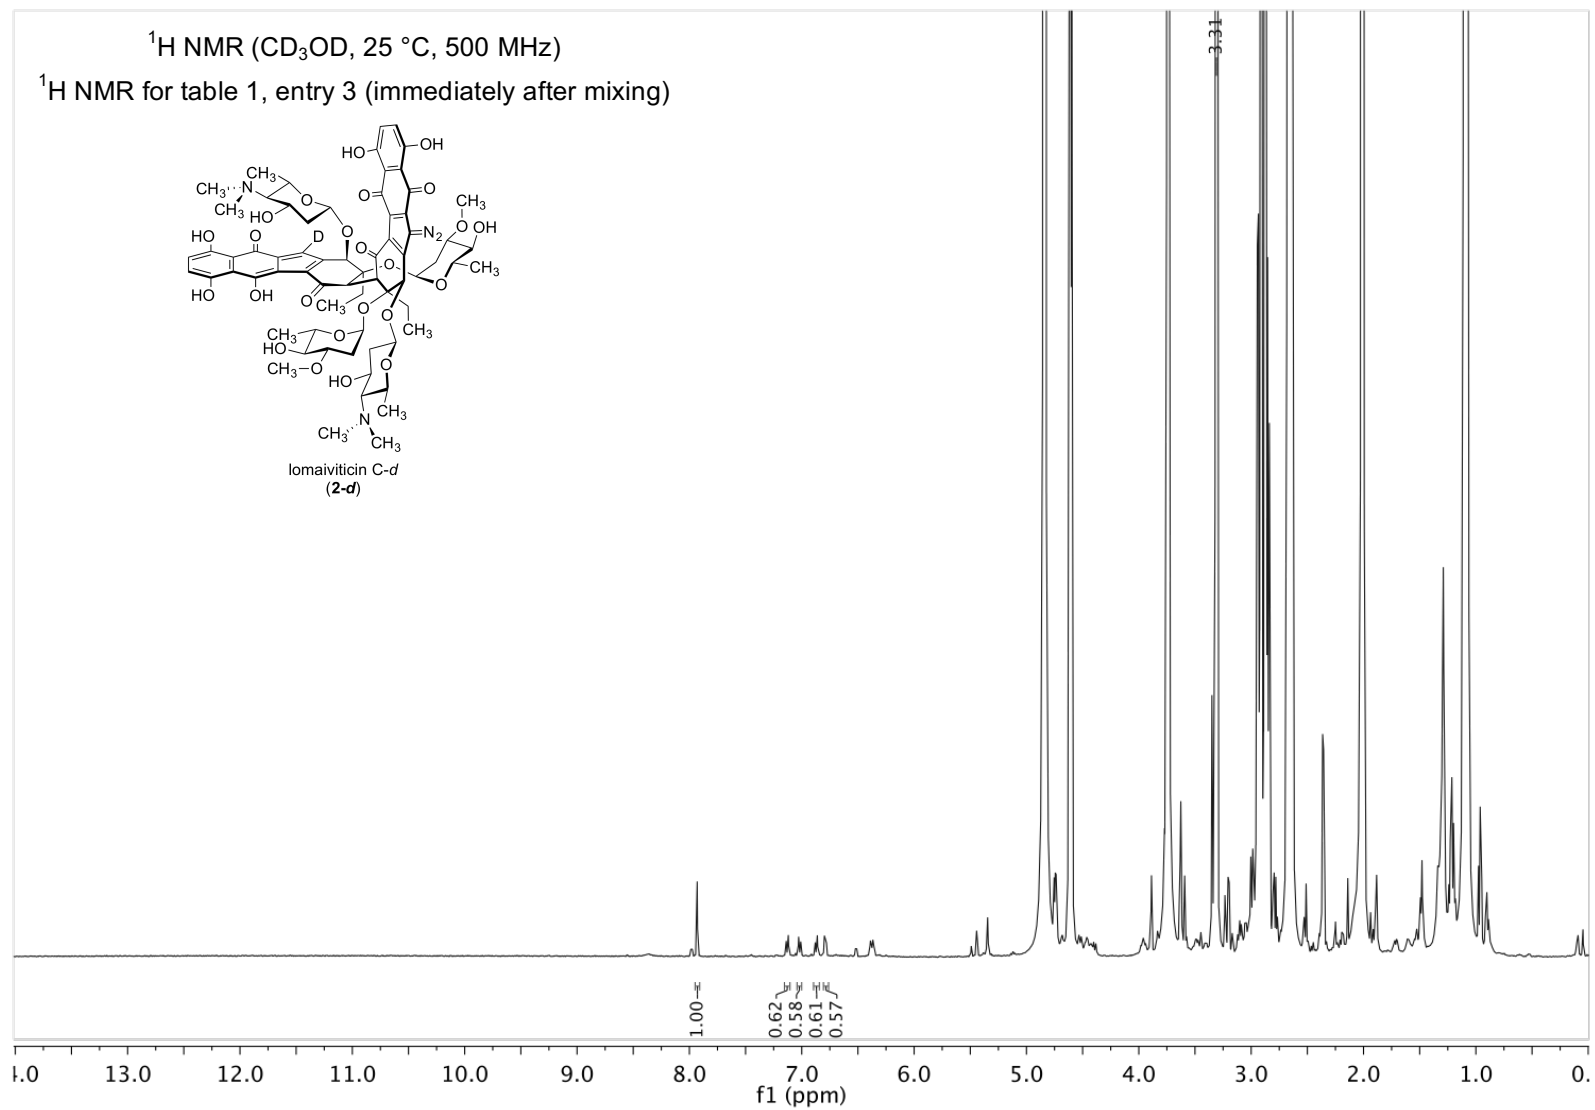

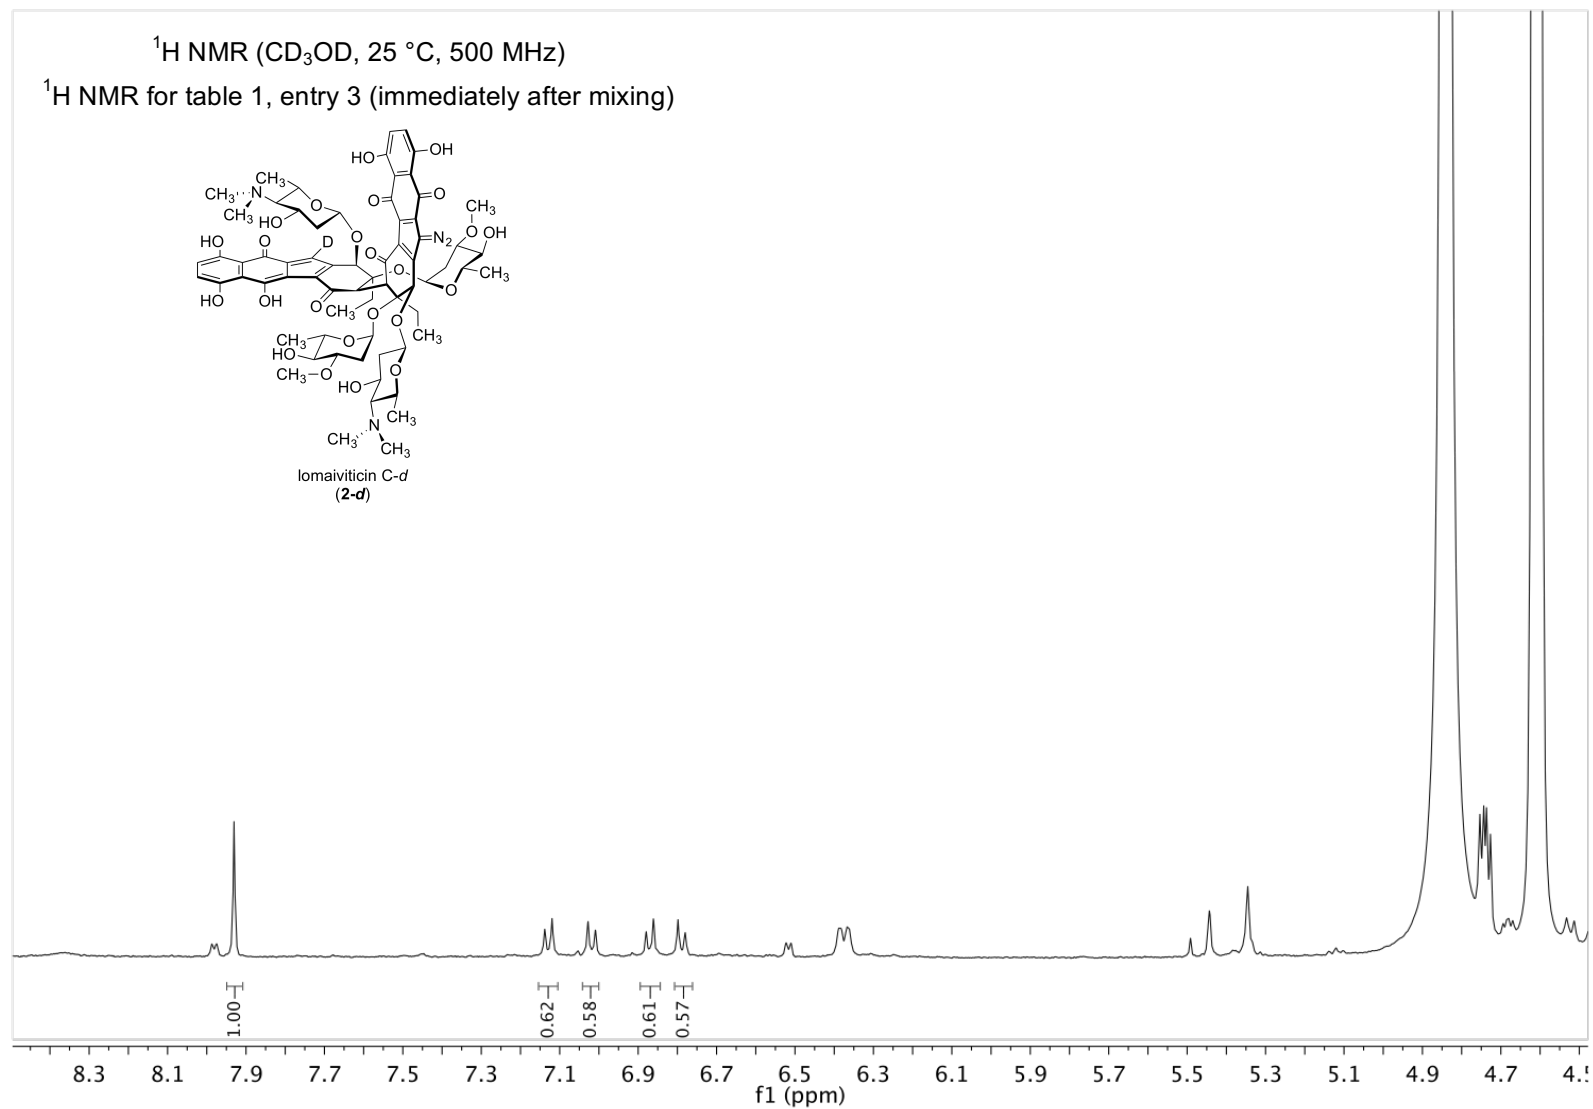

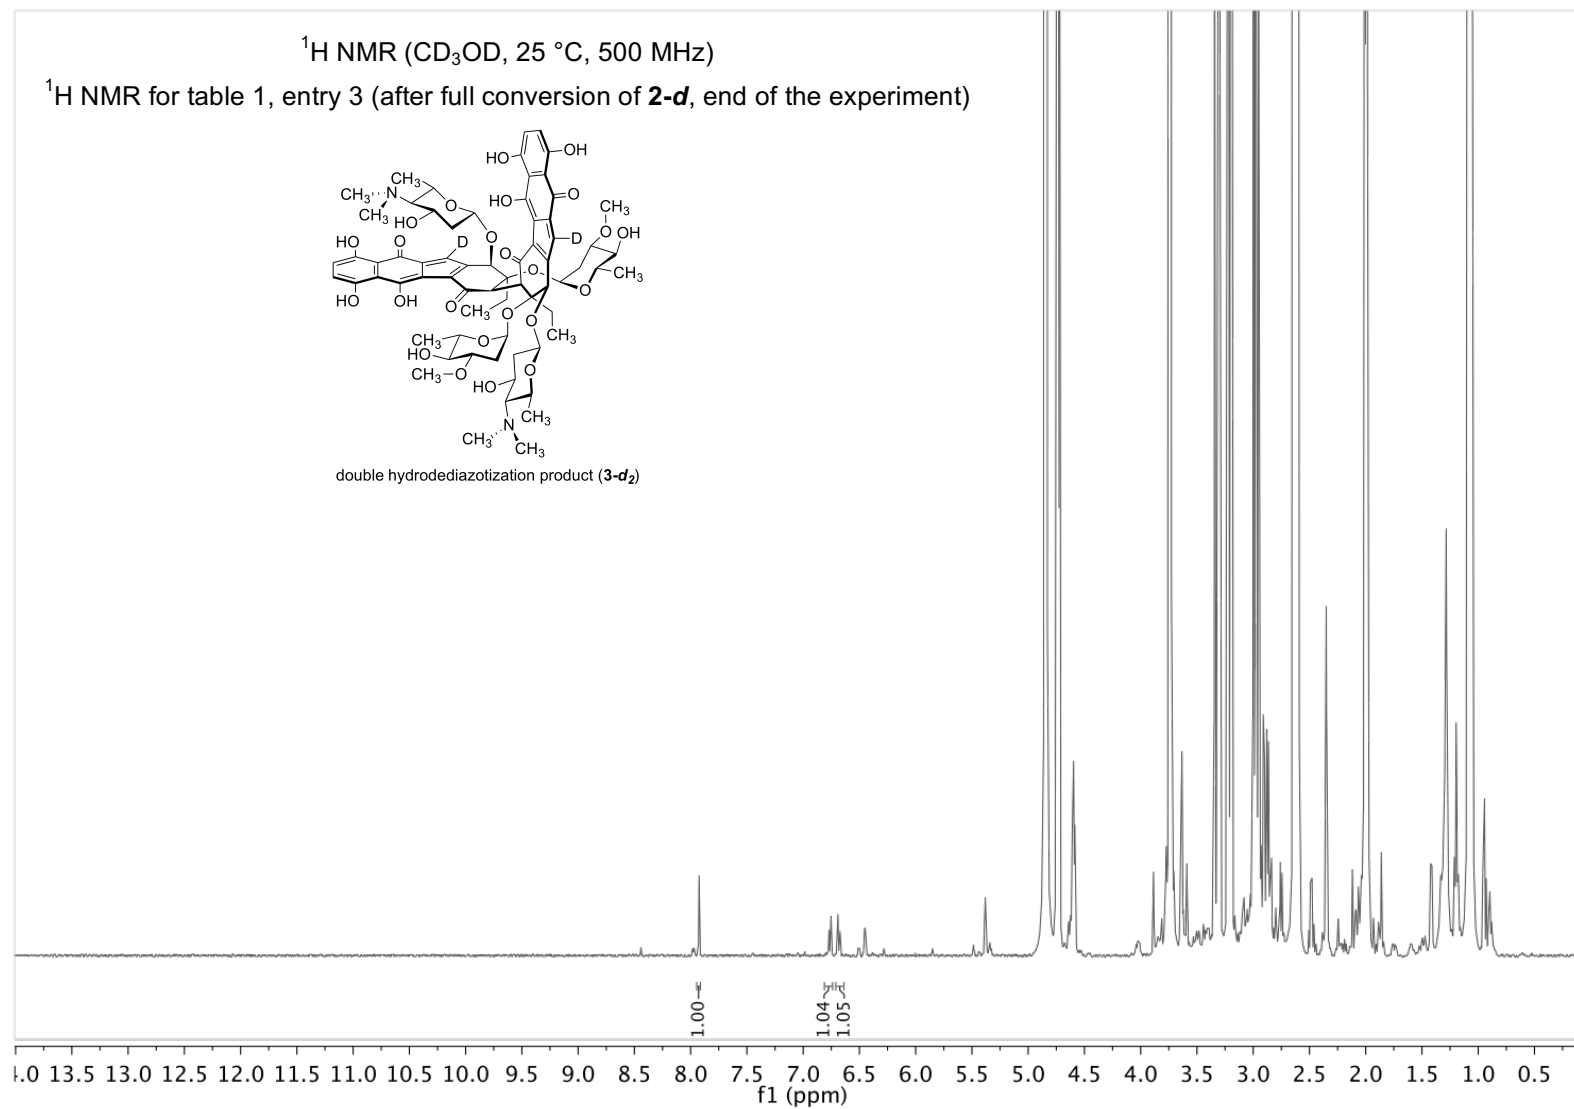



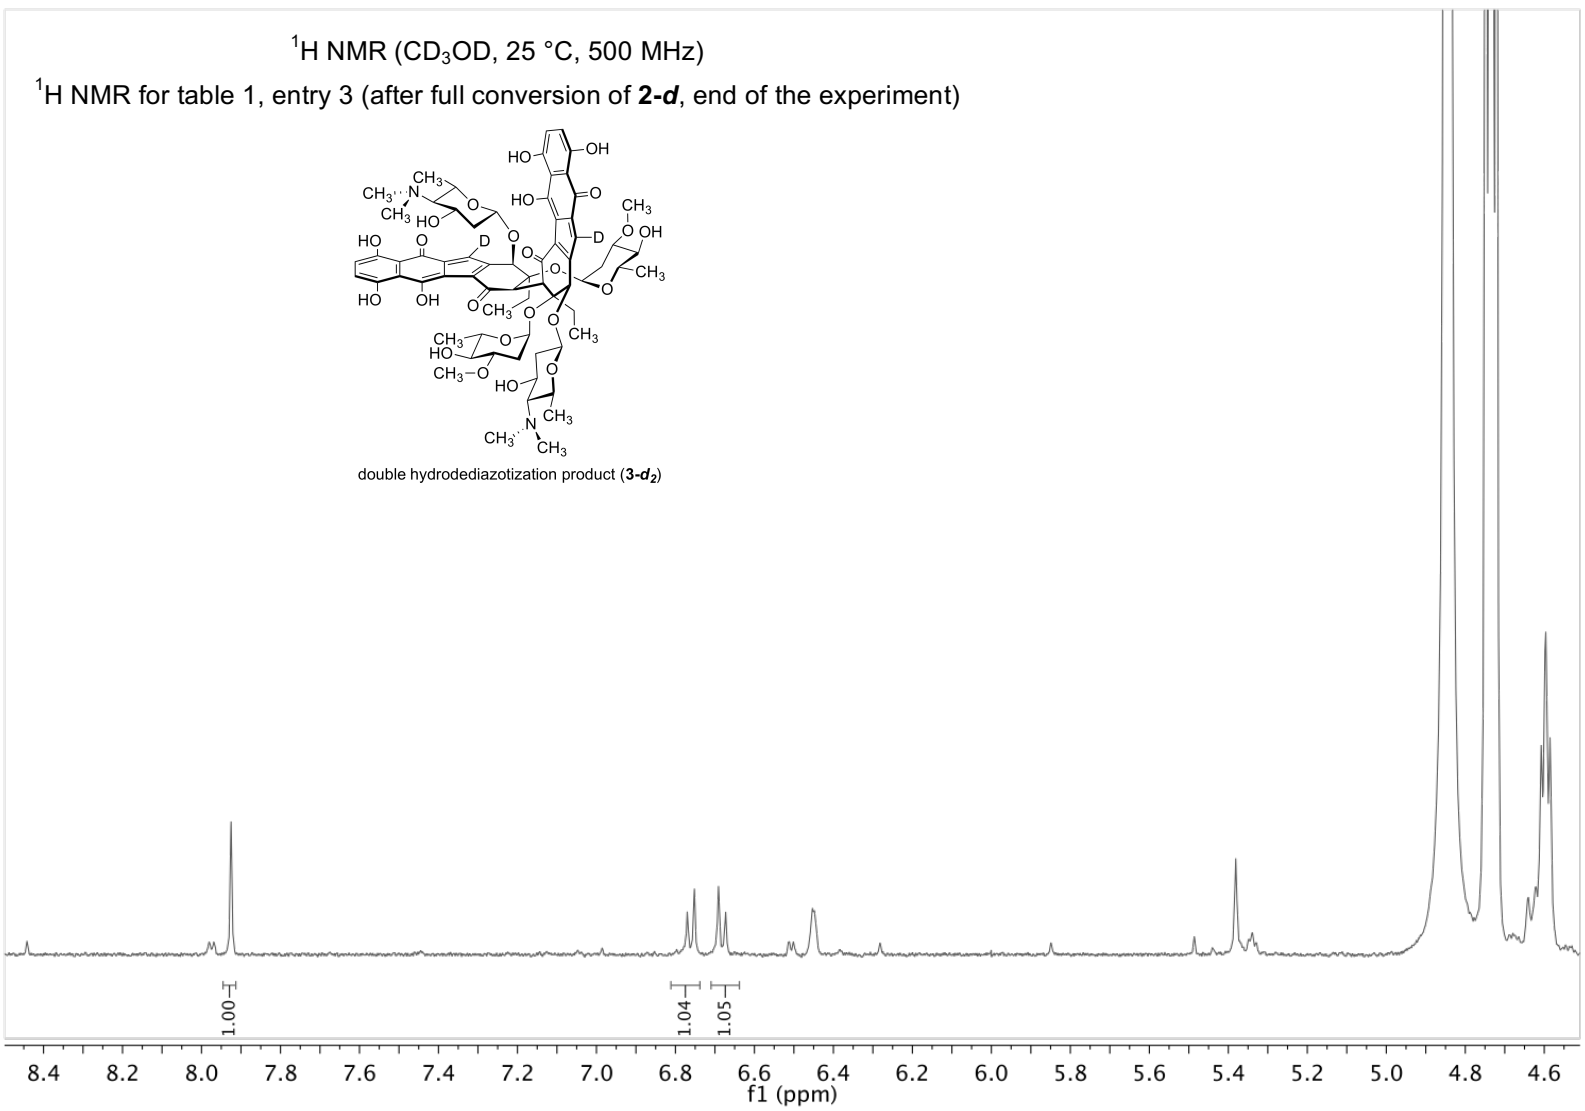

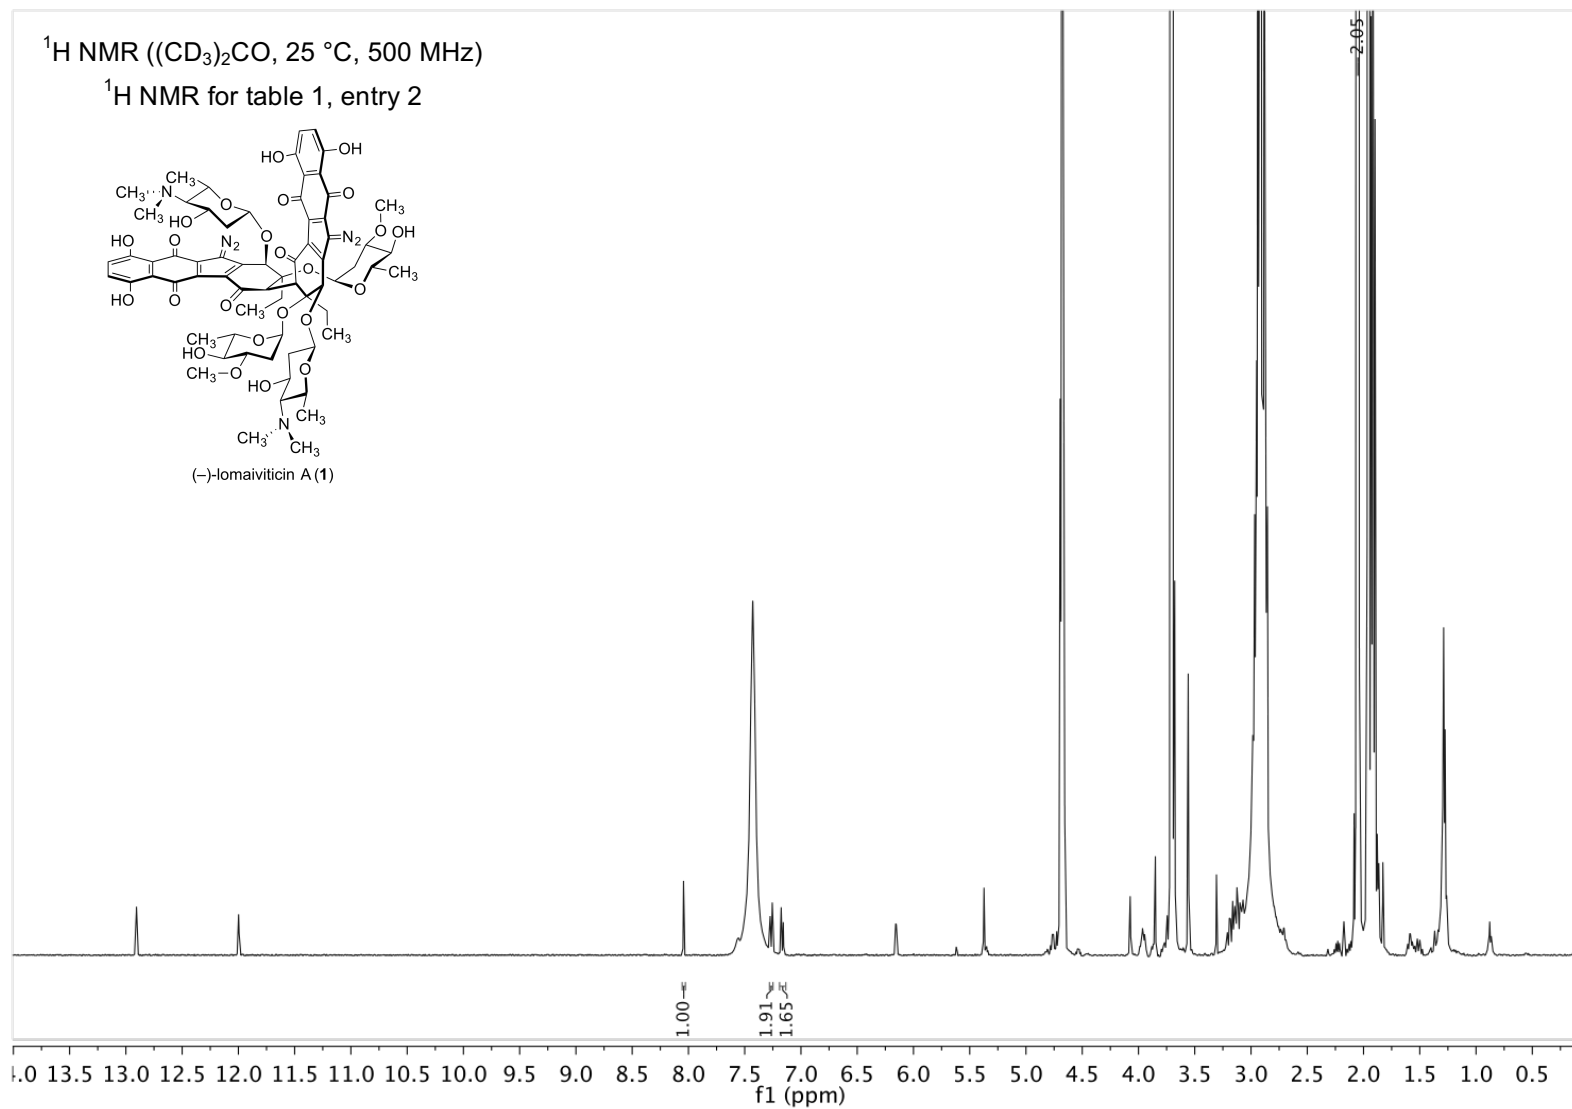

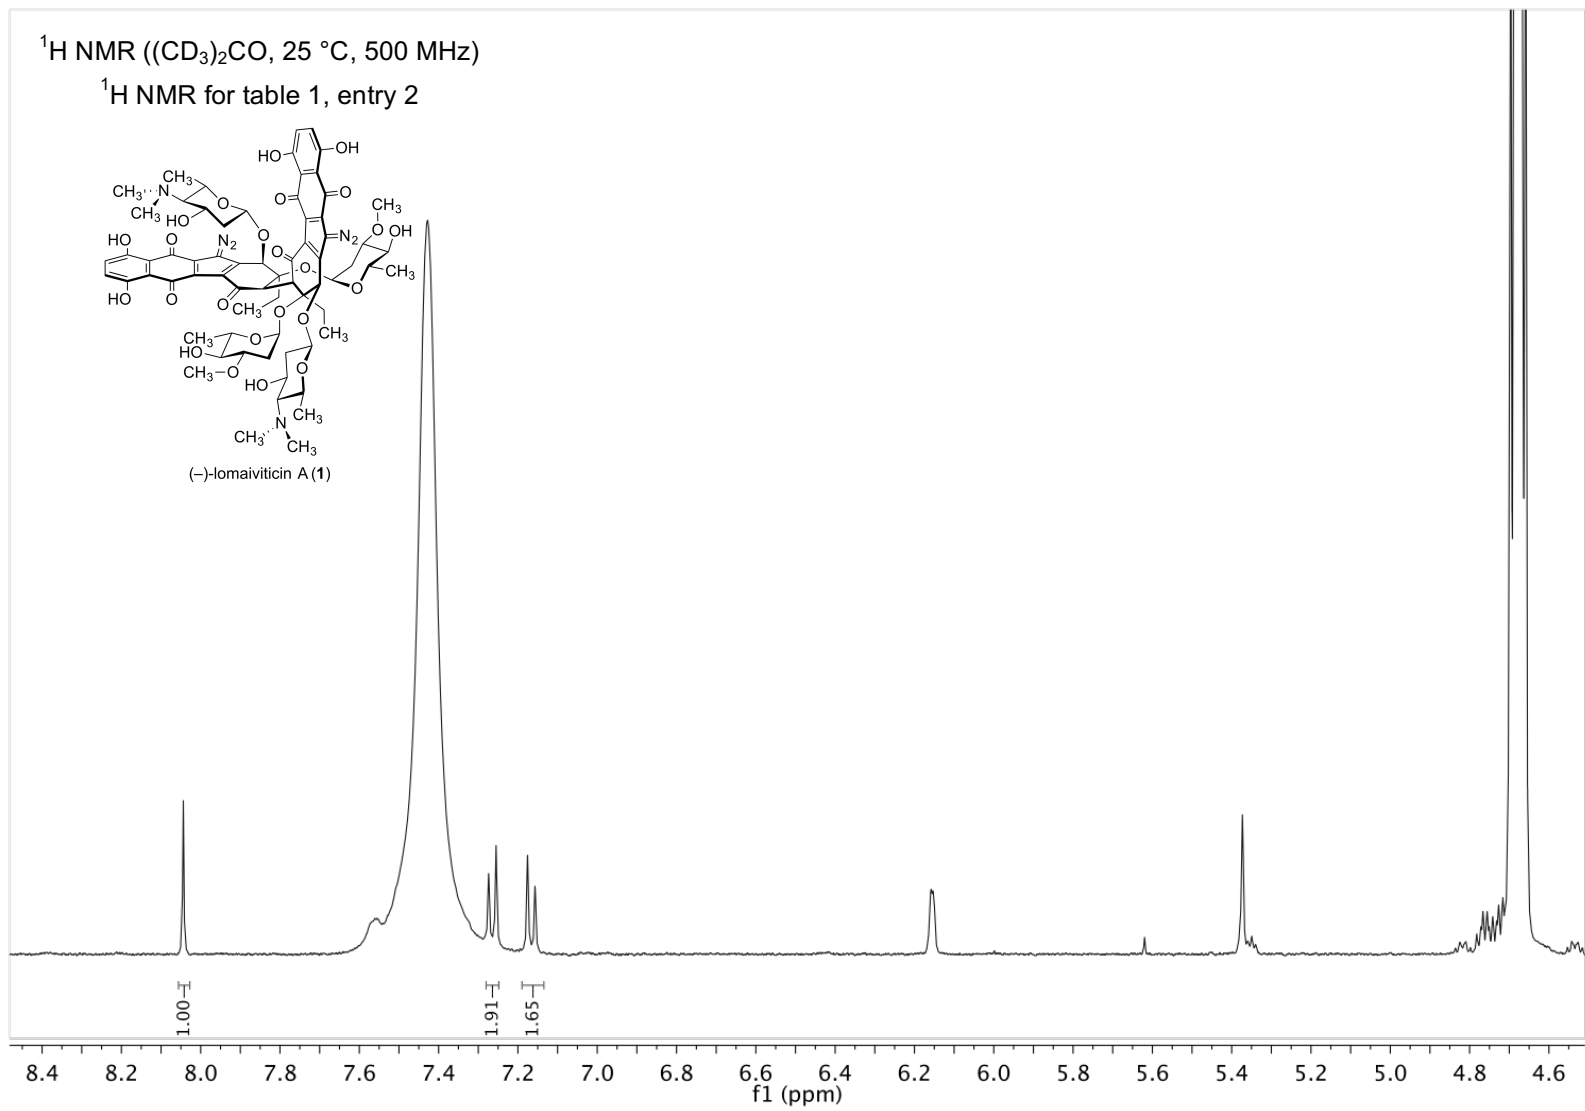

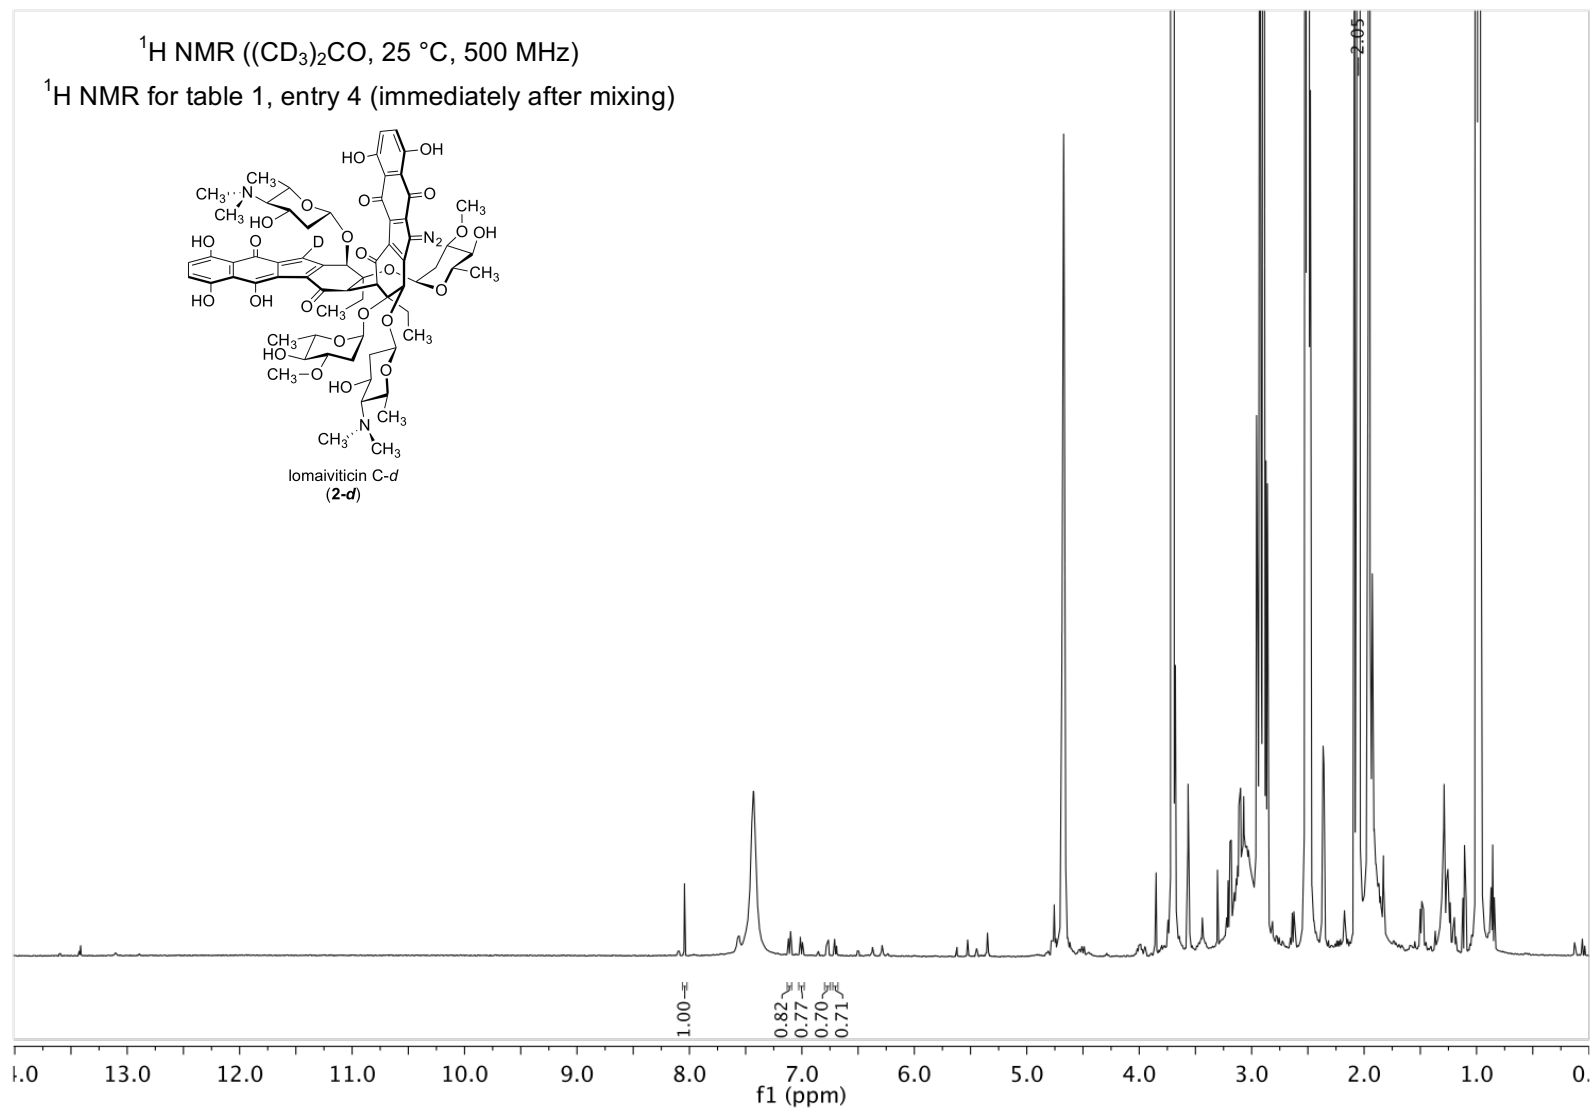

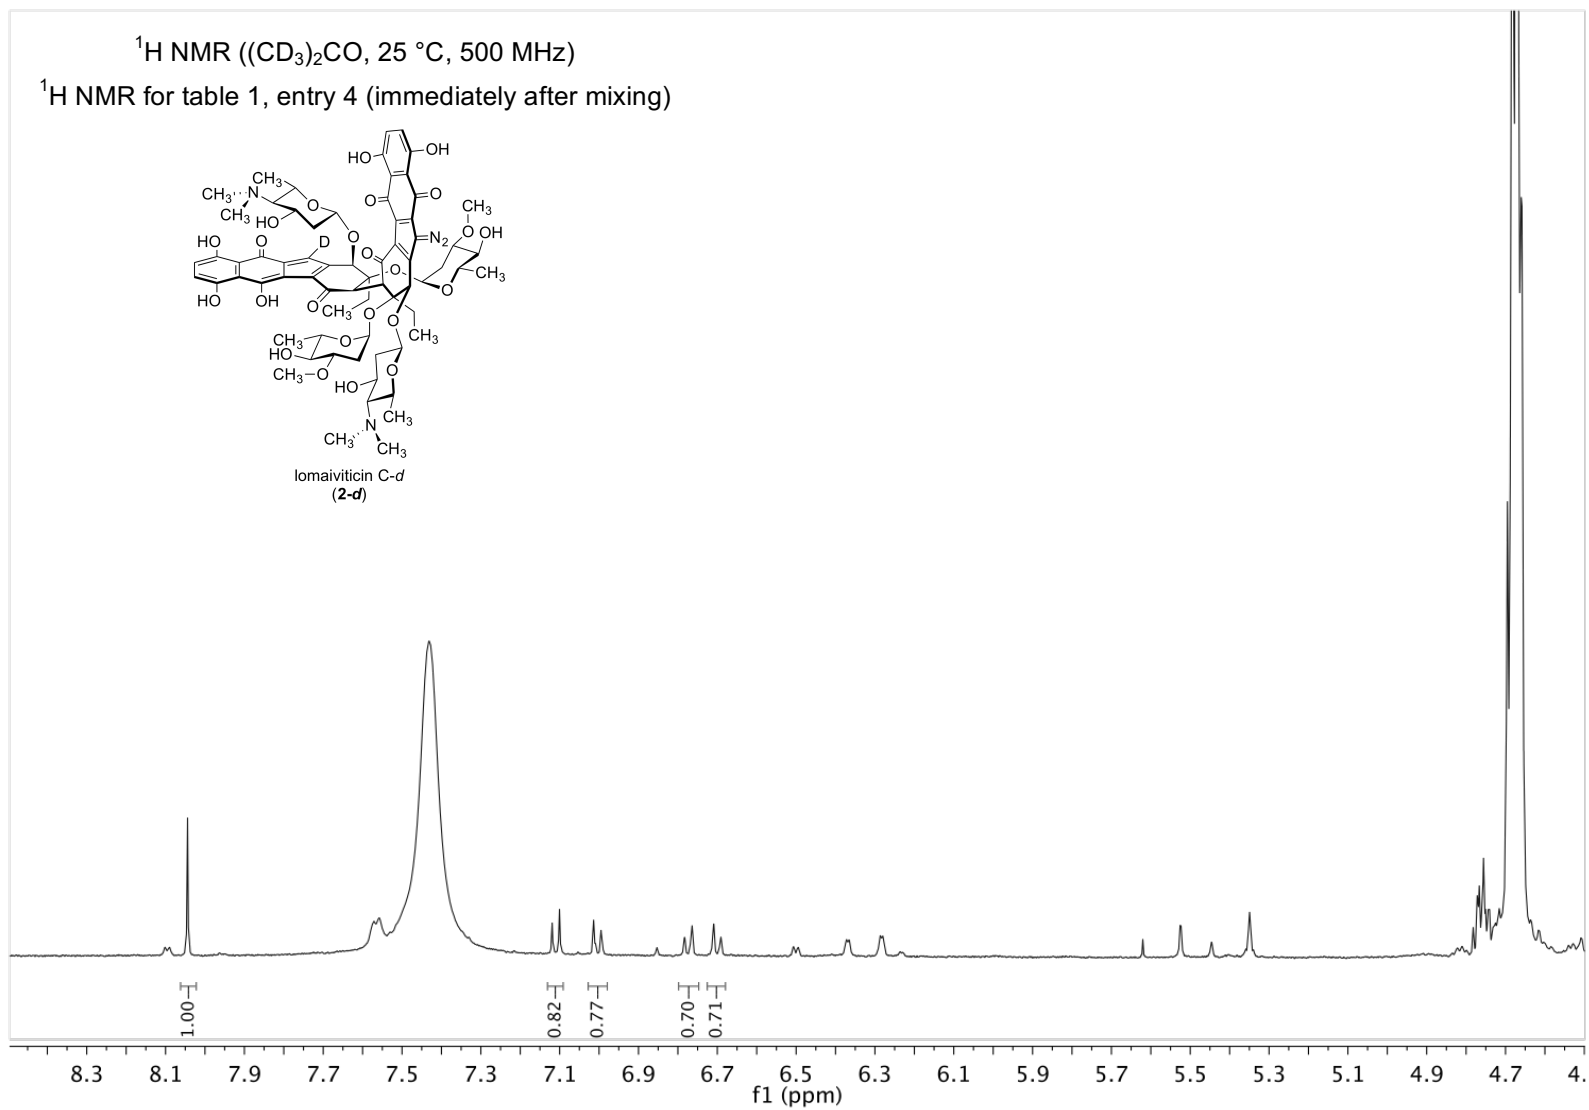

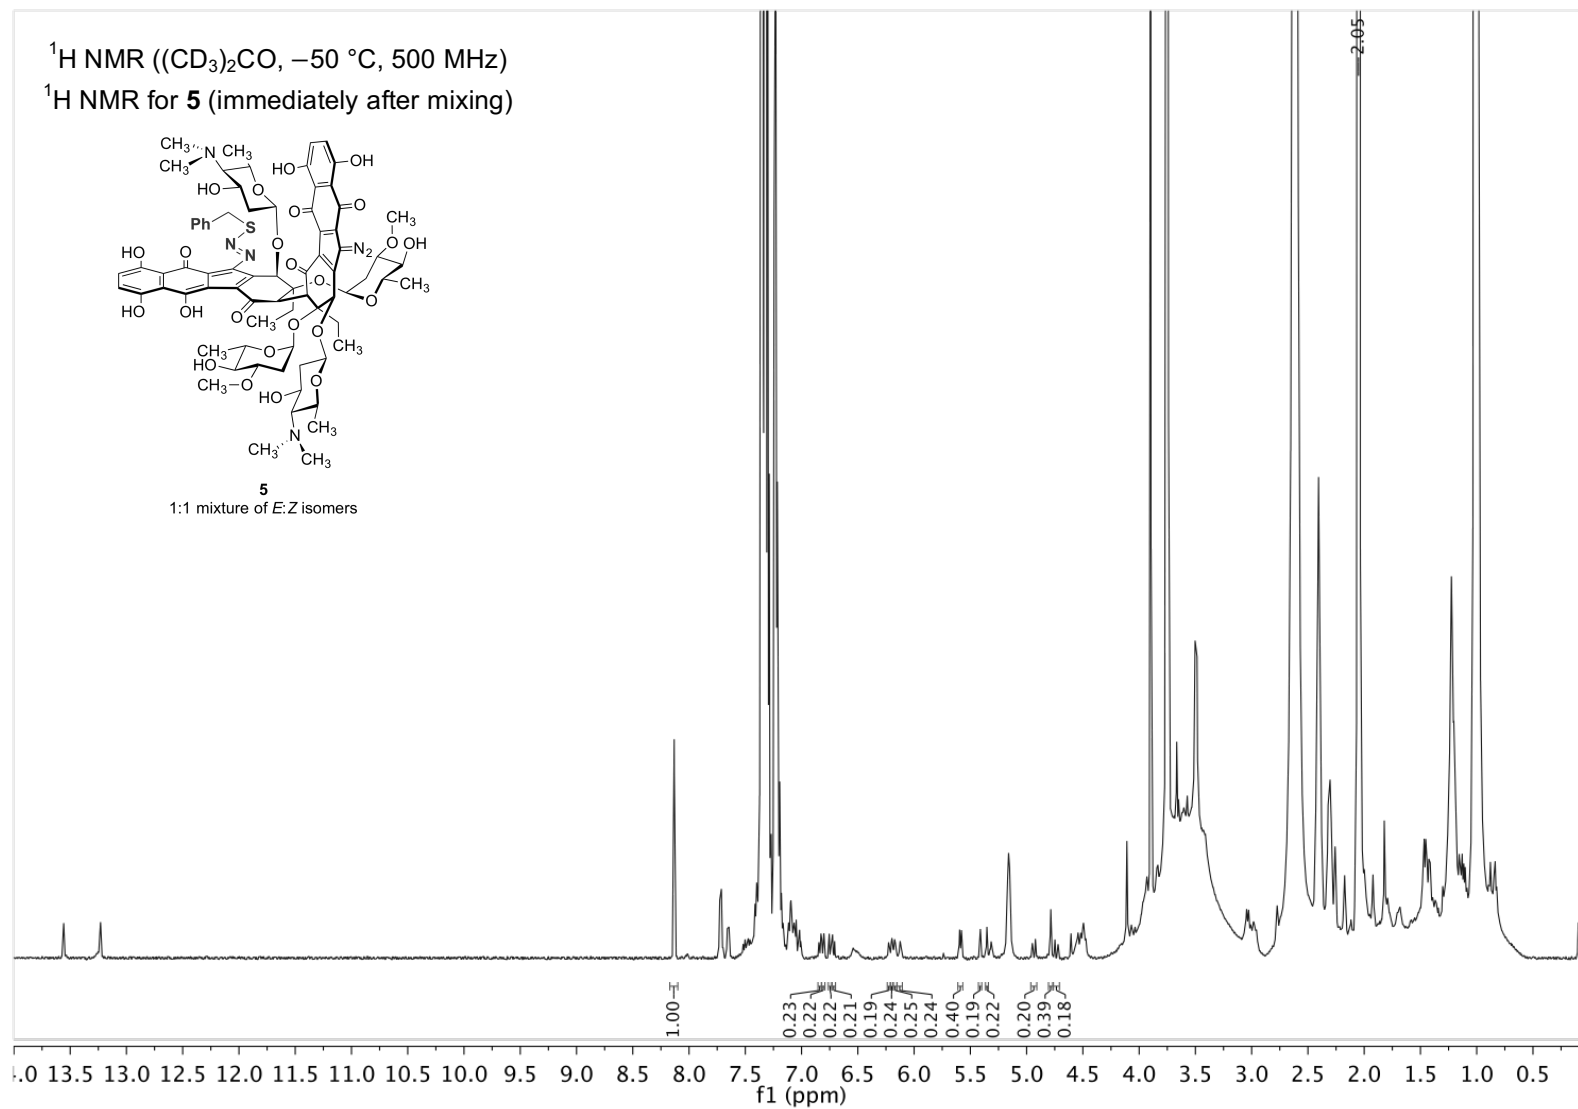

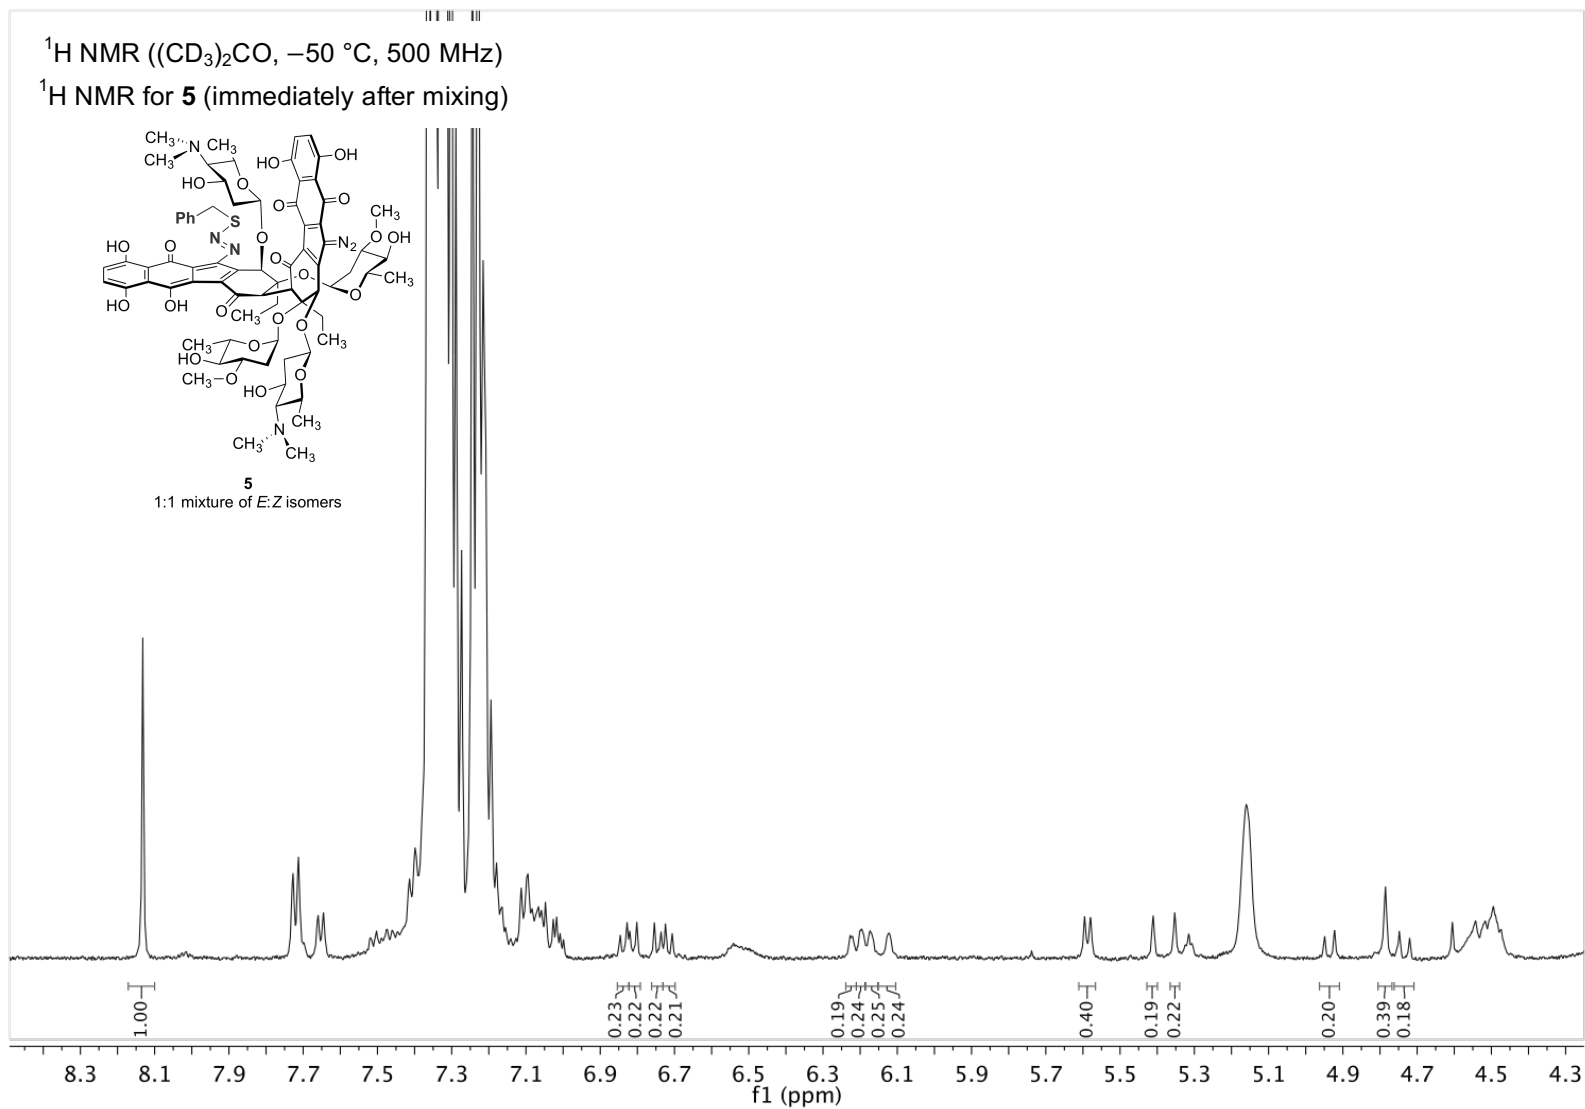

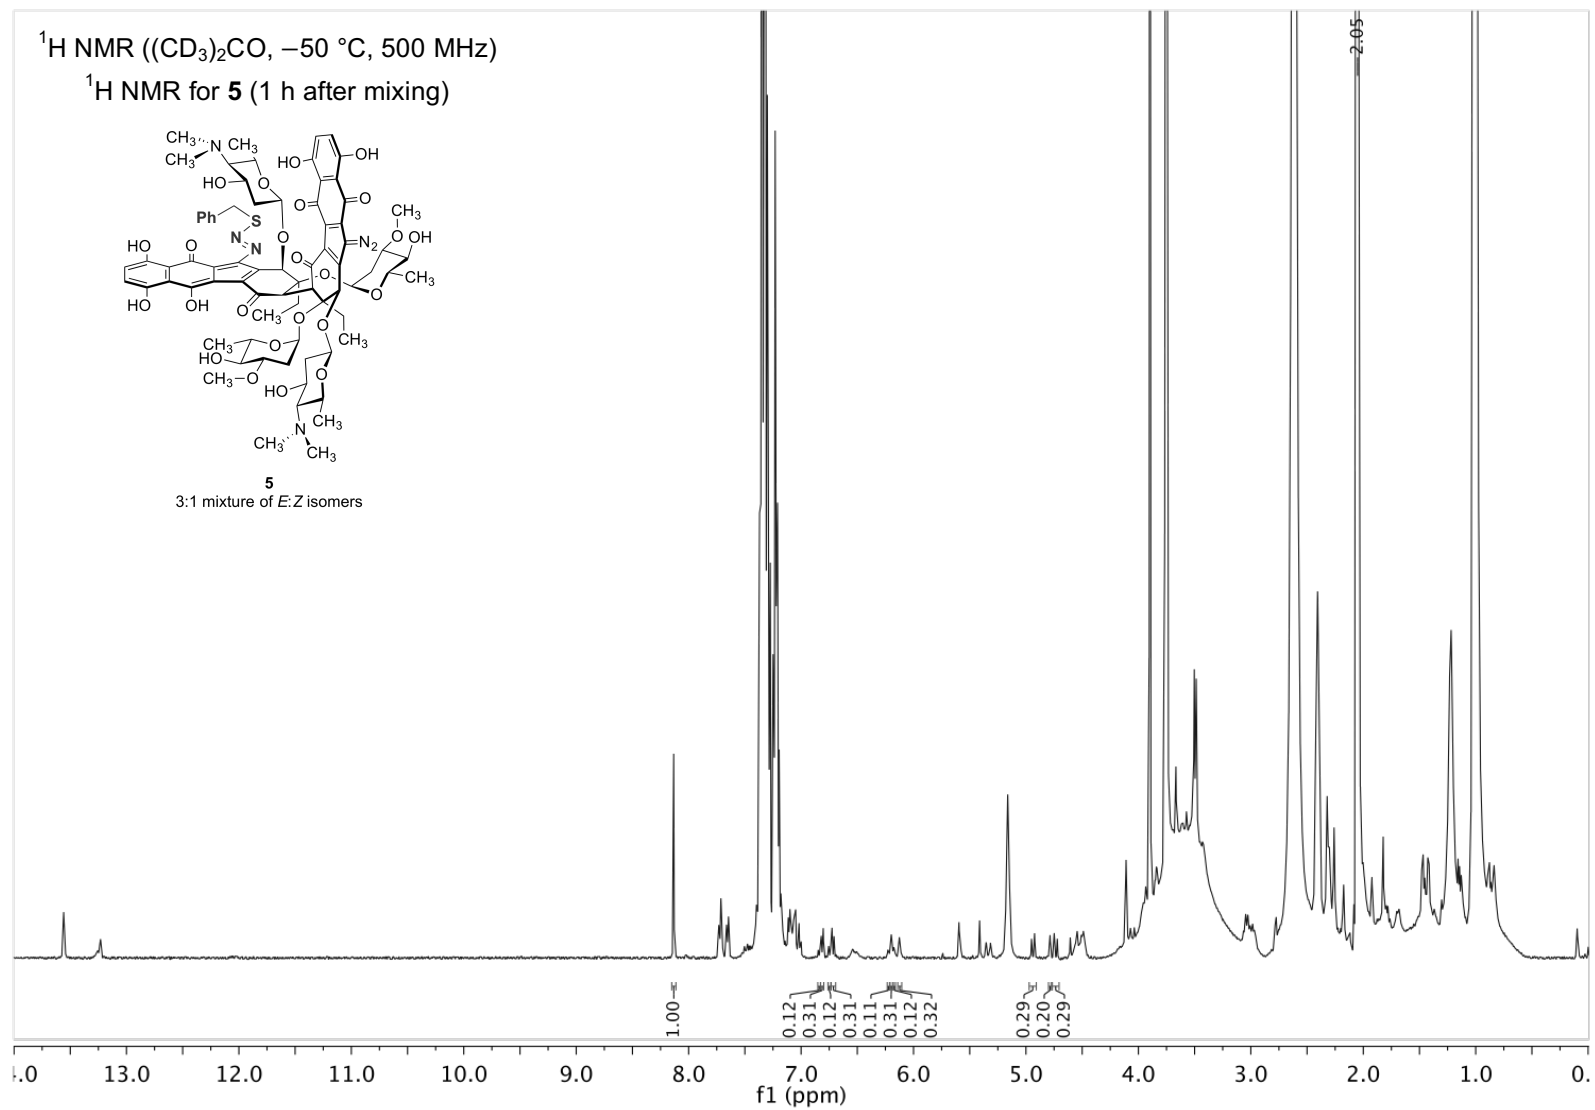



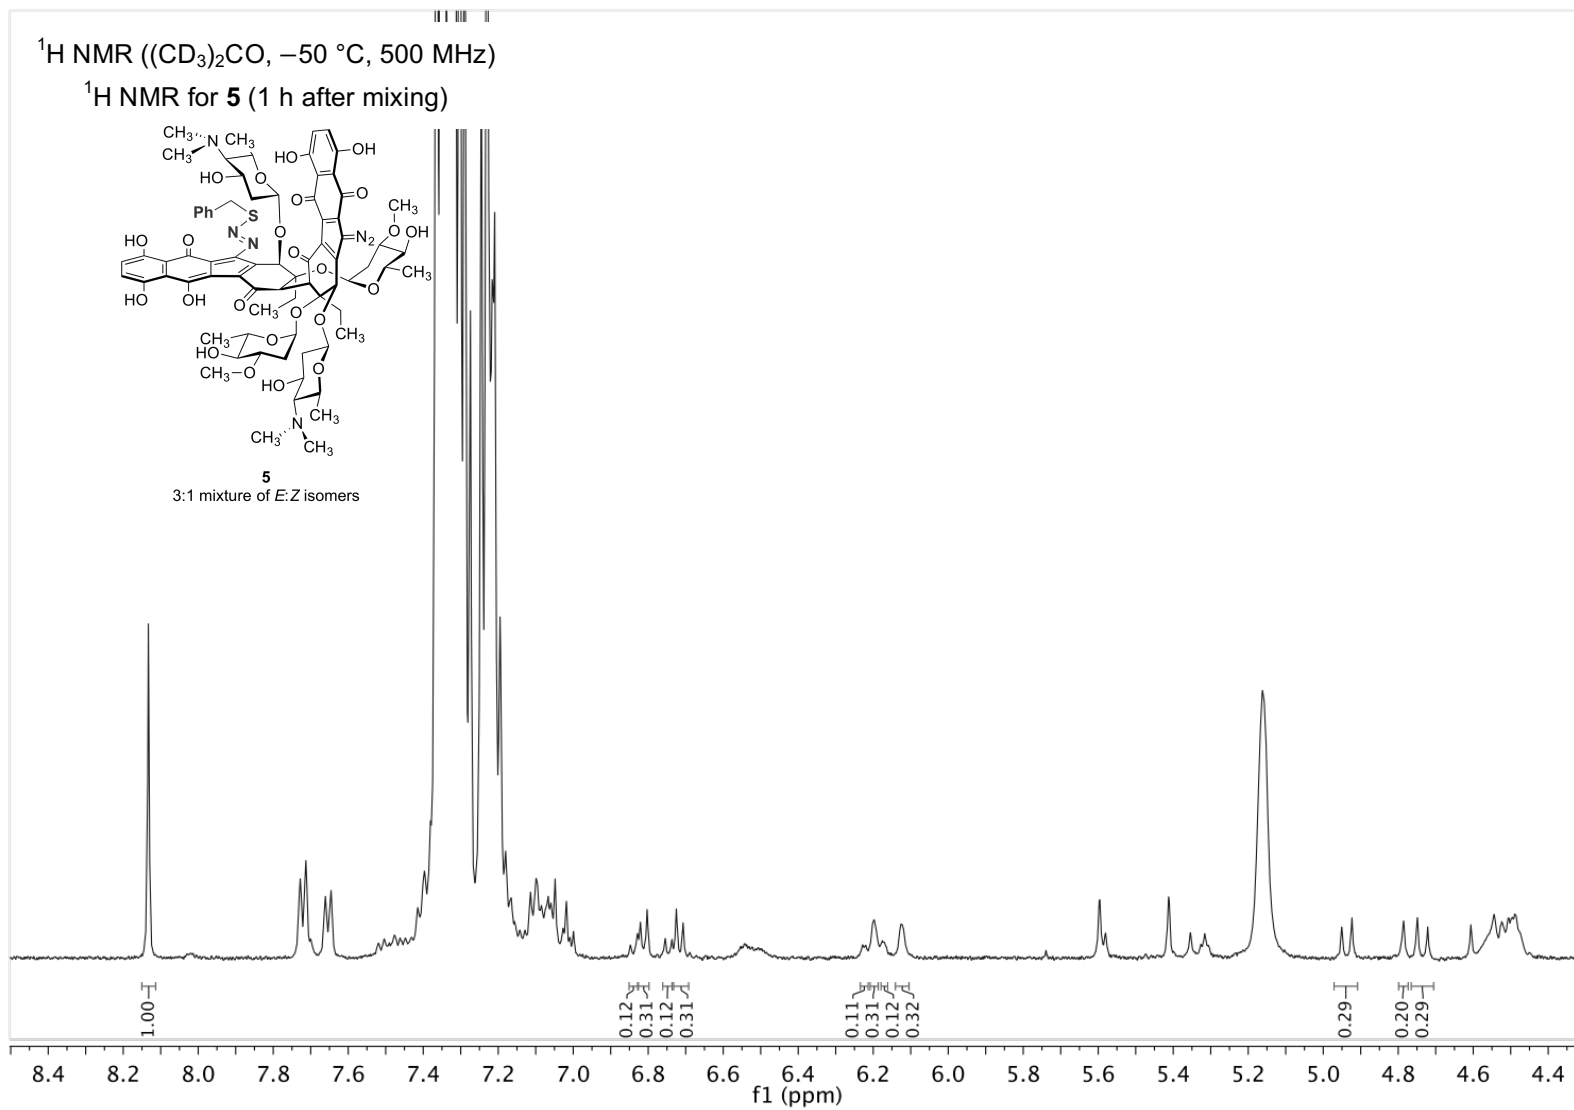

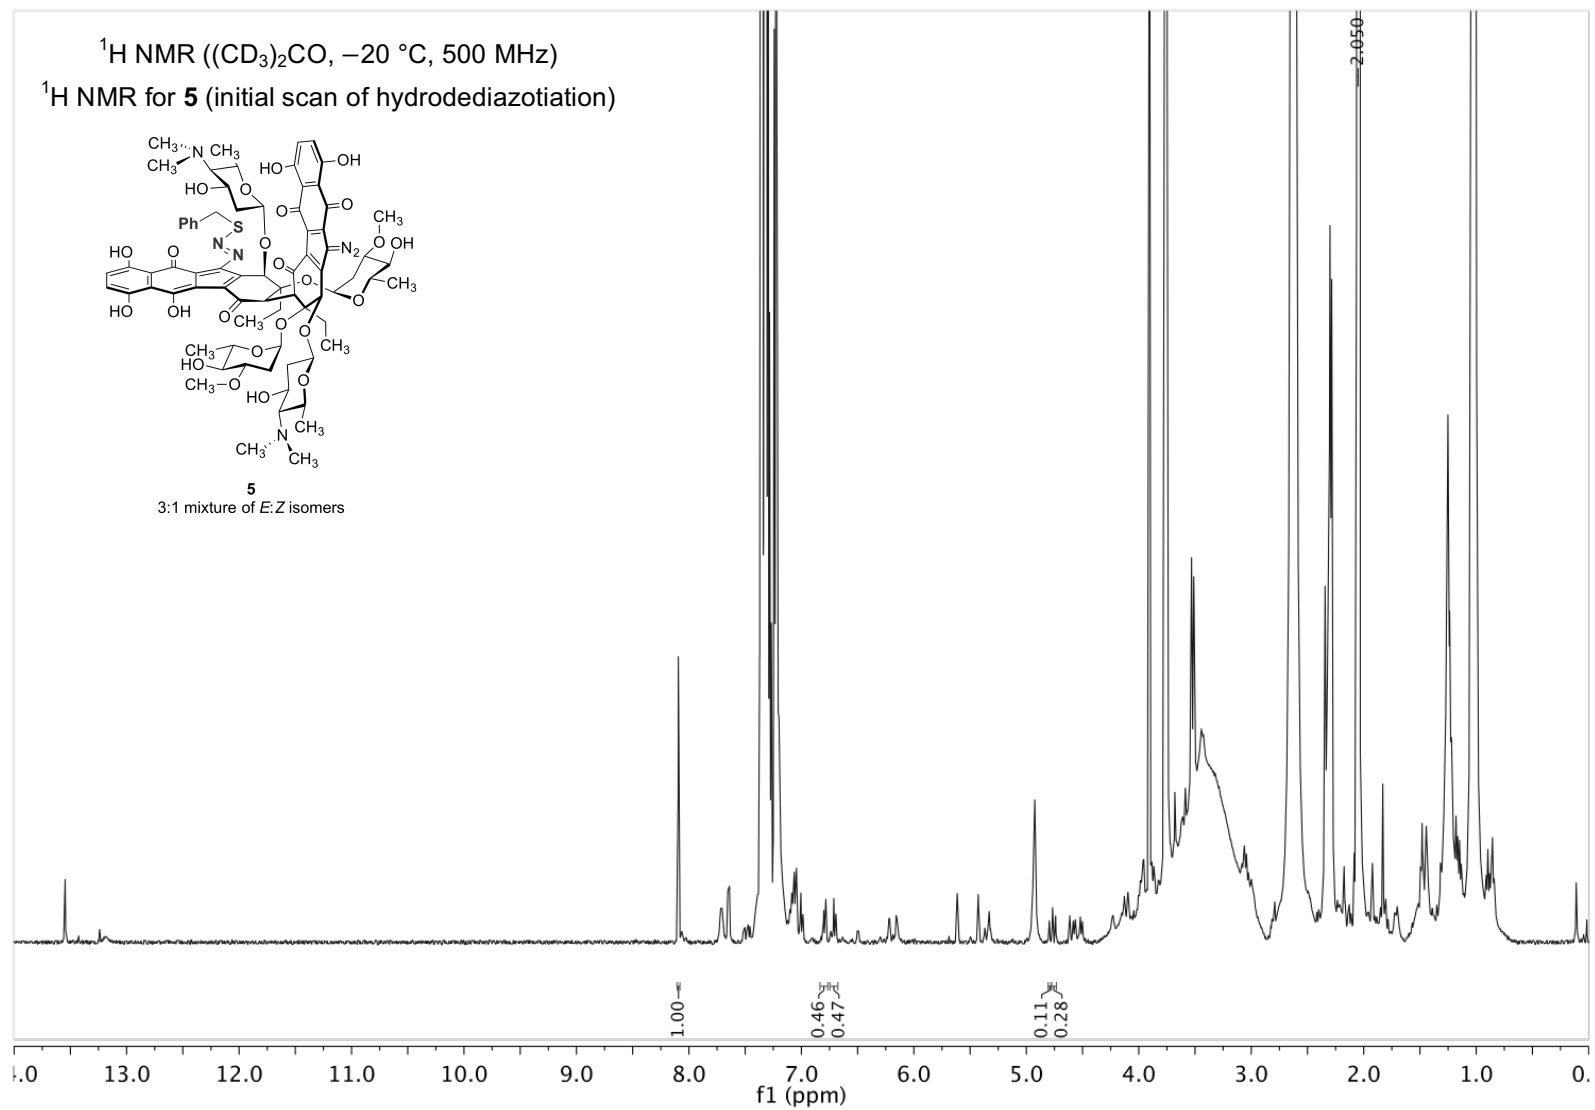

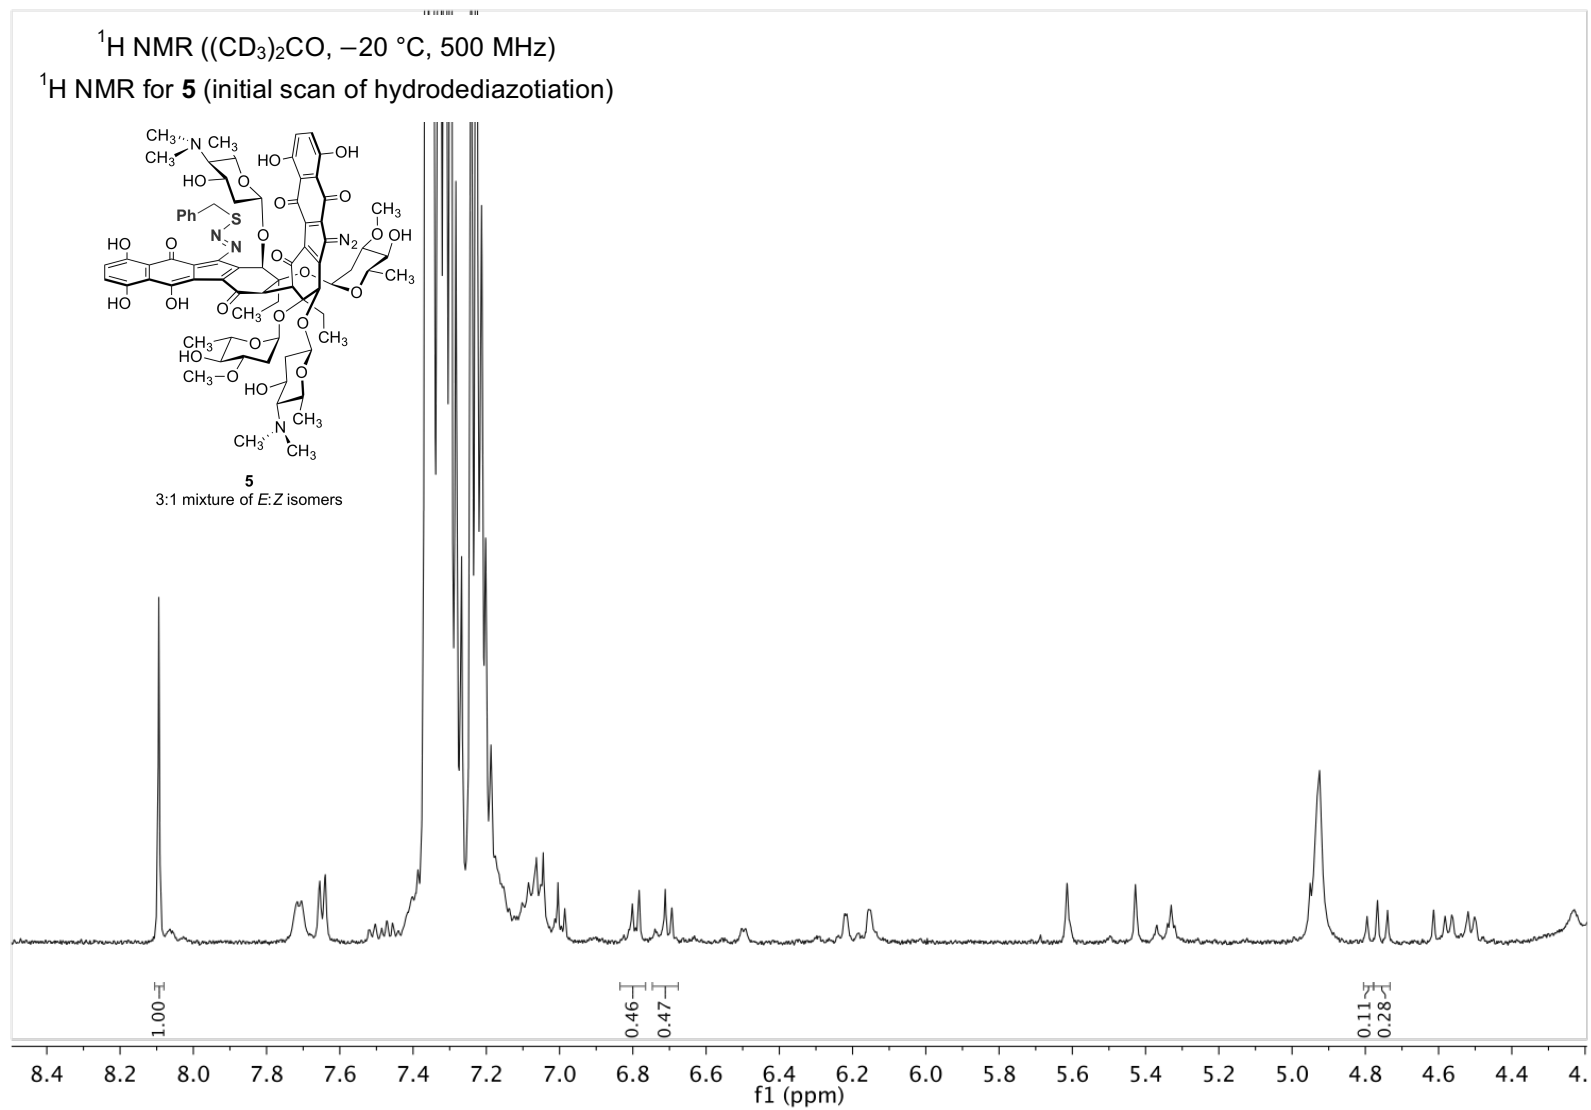

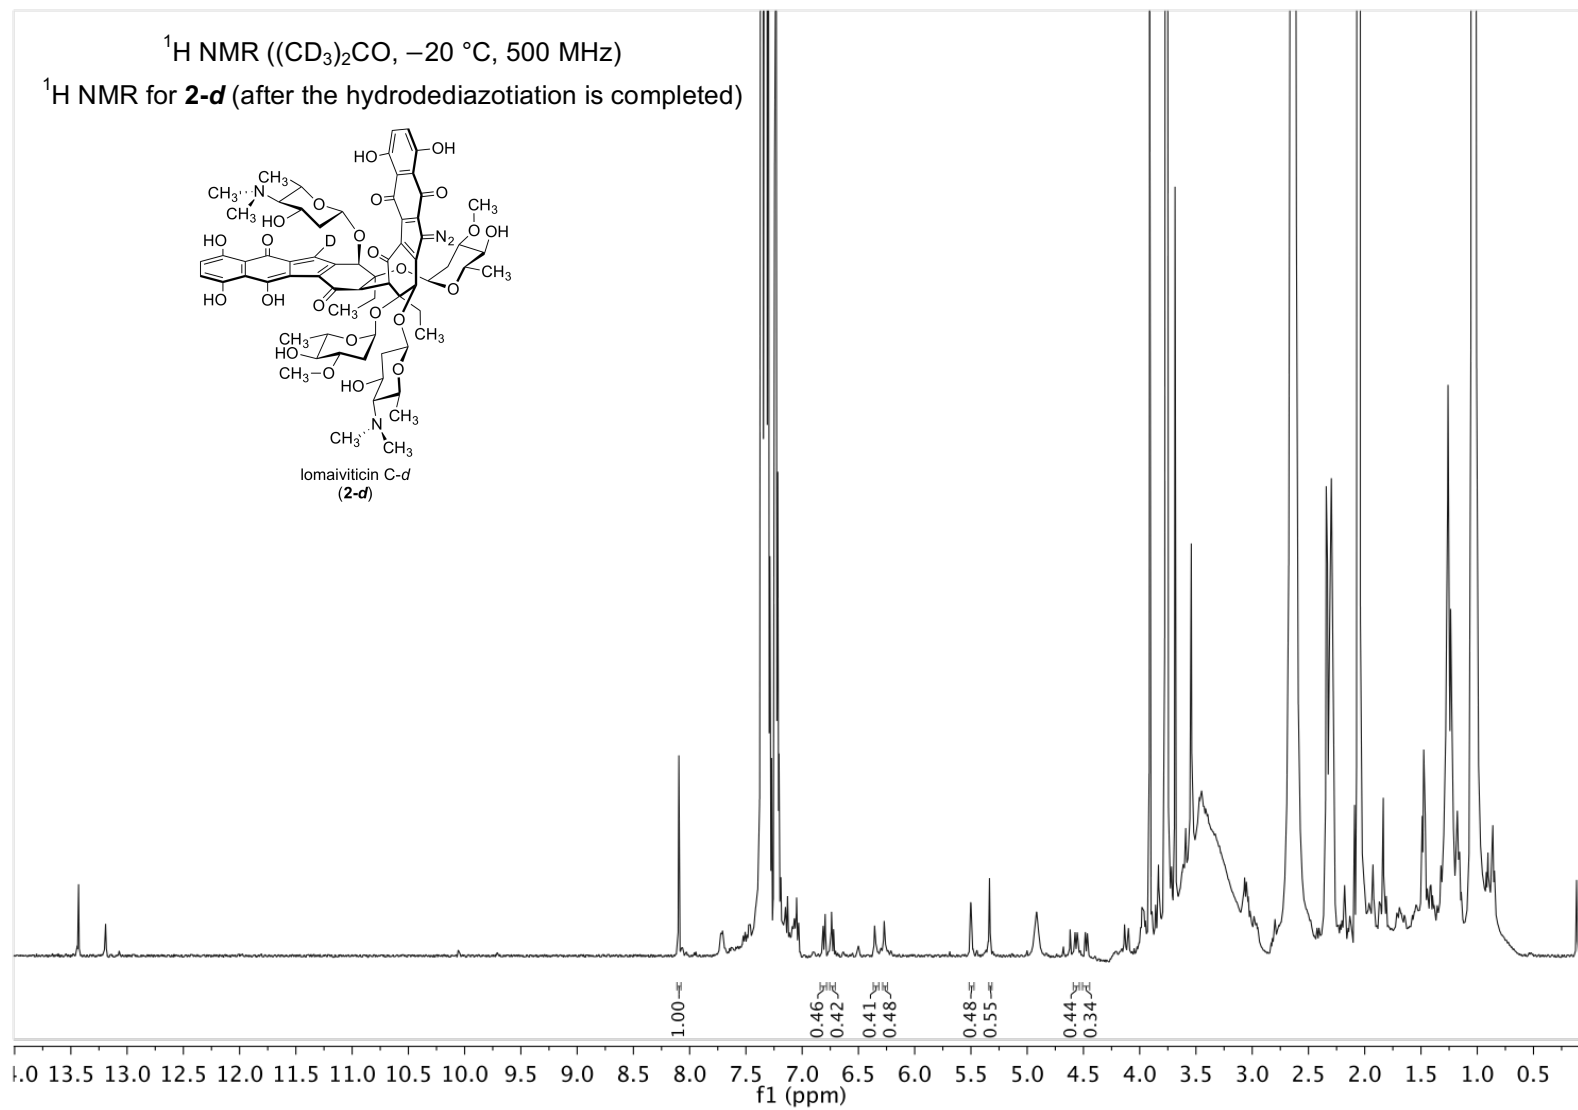

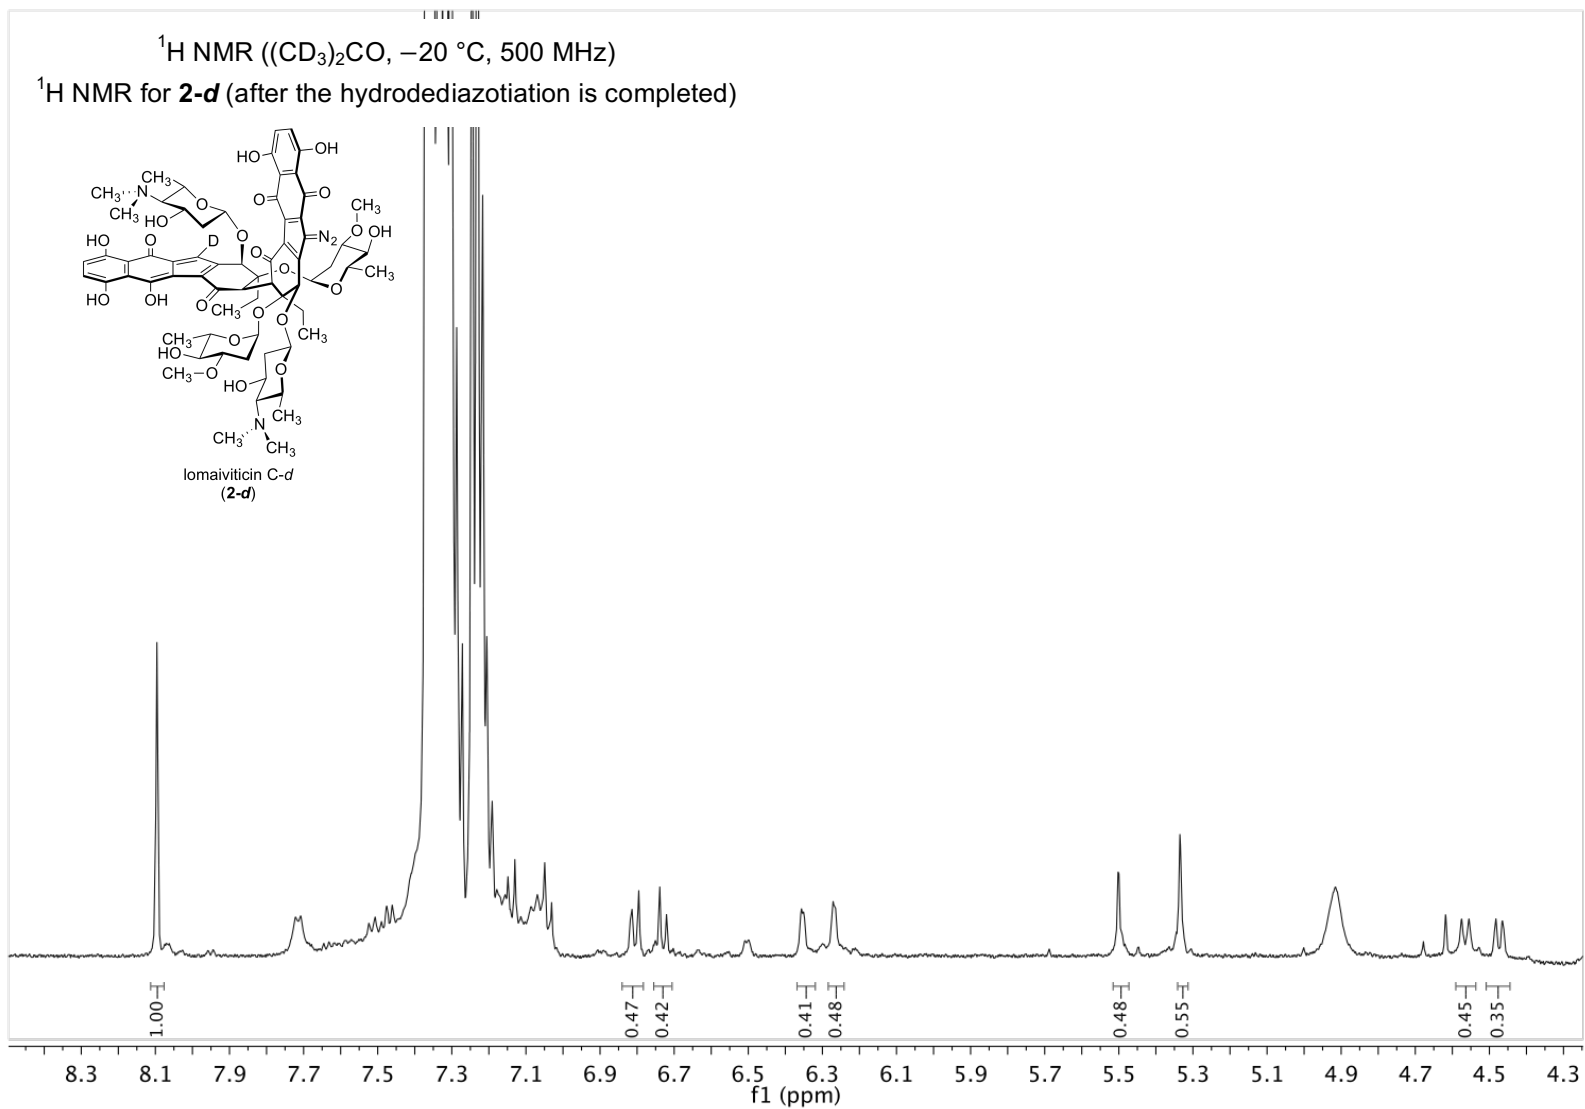

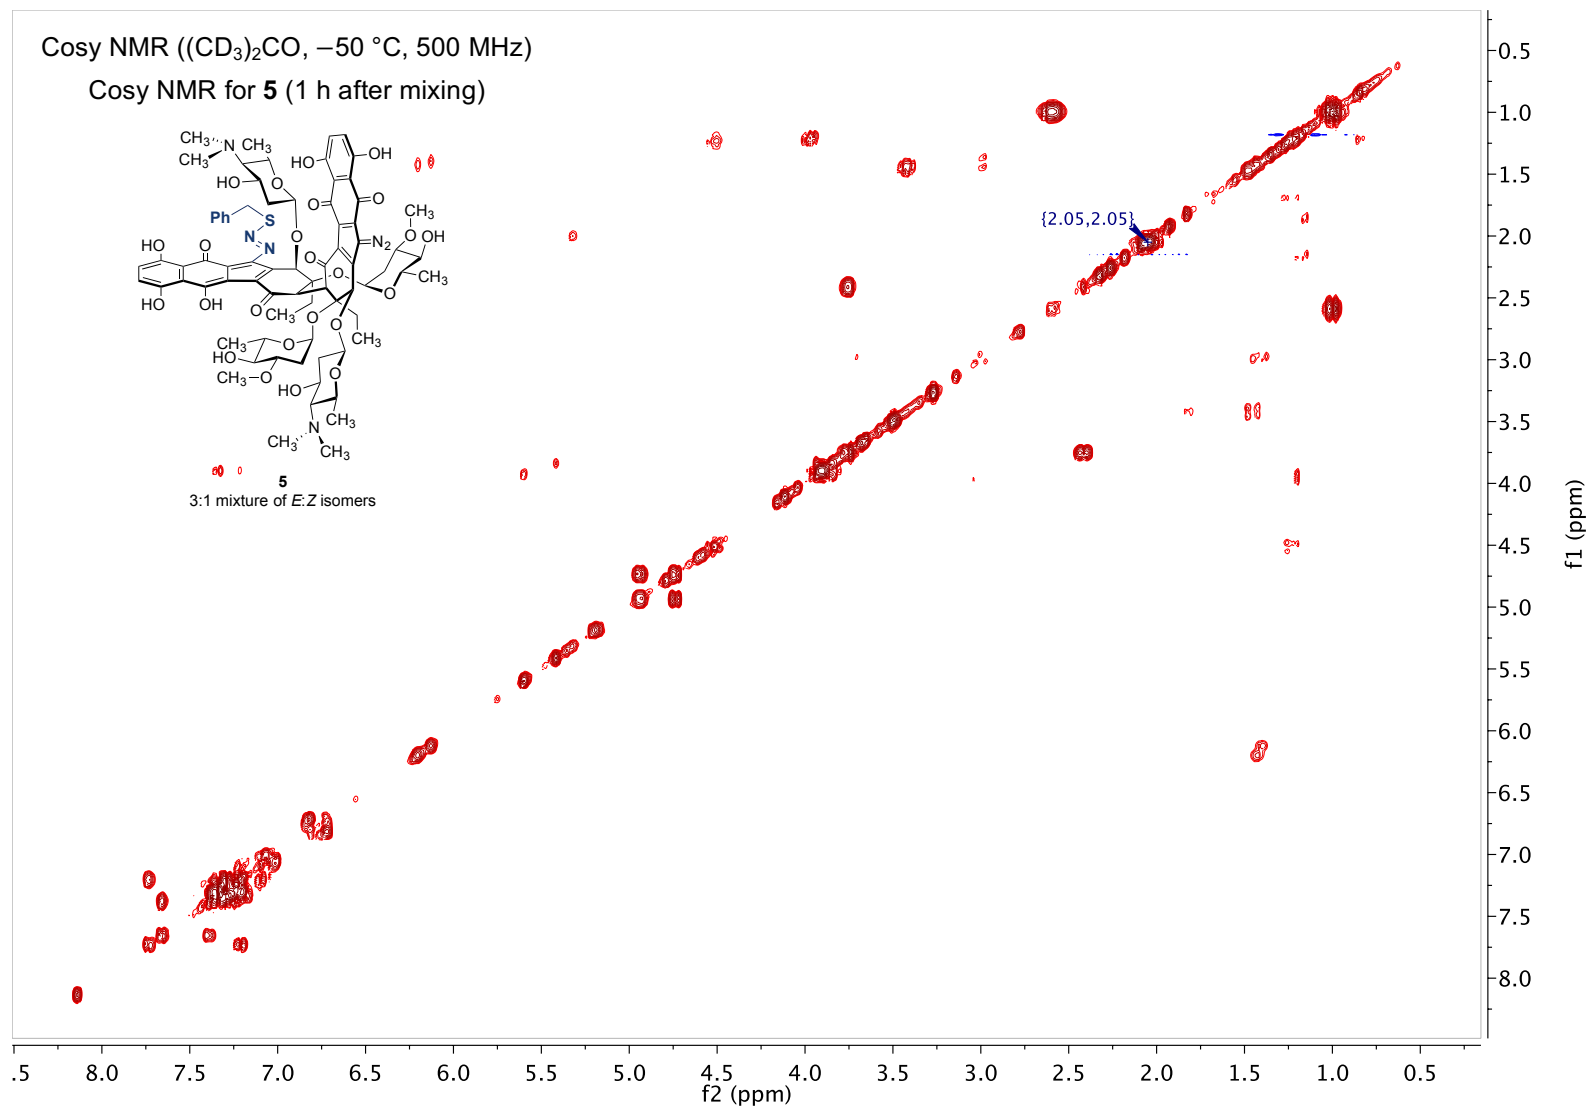

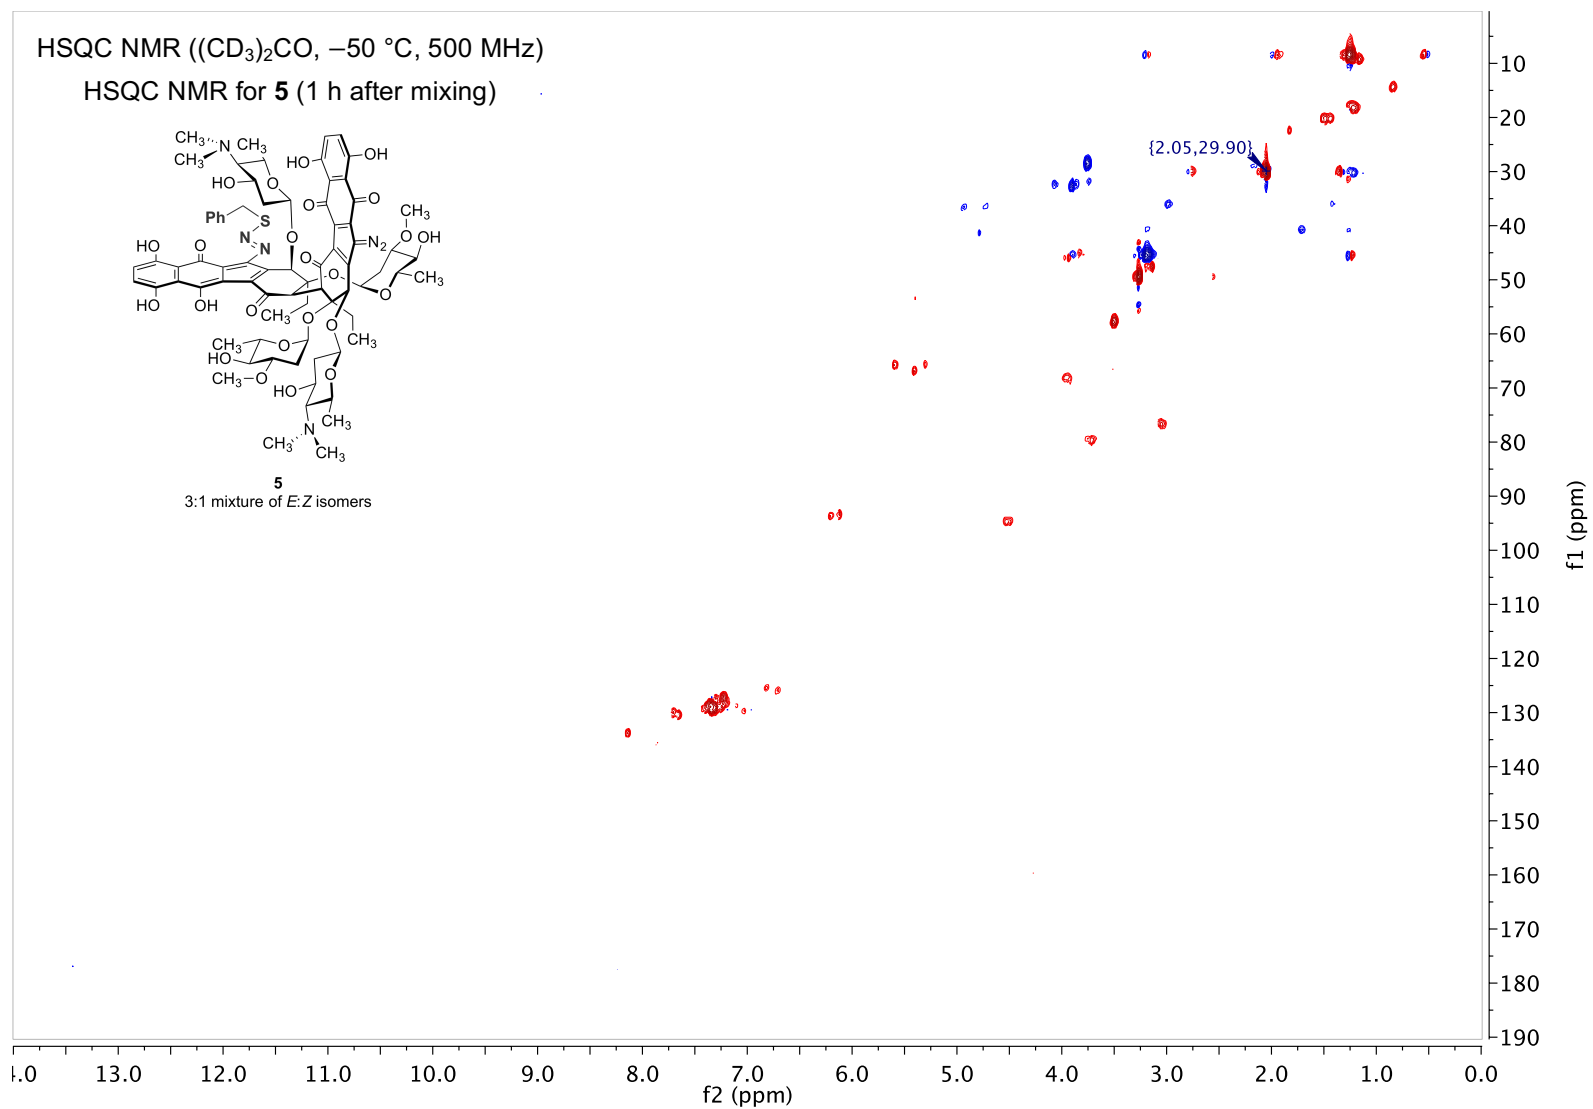

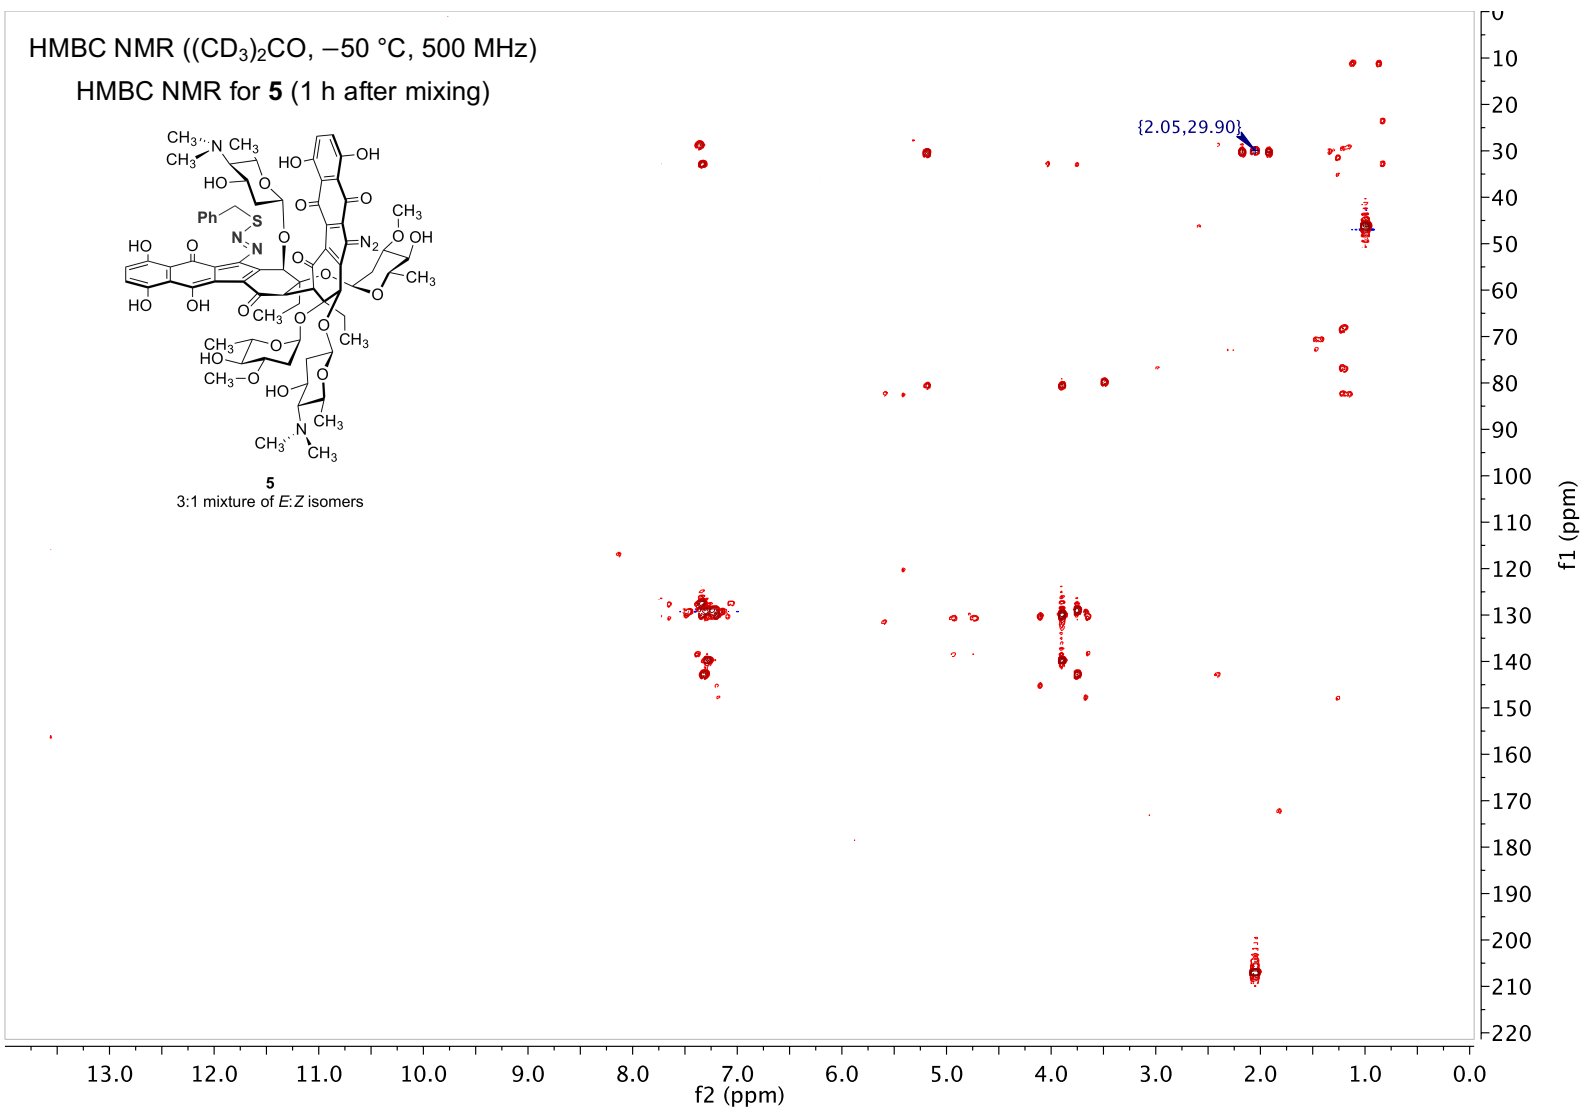



### Catalog of High Resolution Mass Spectra.

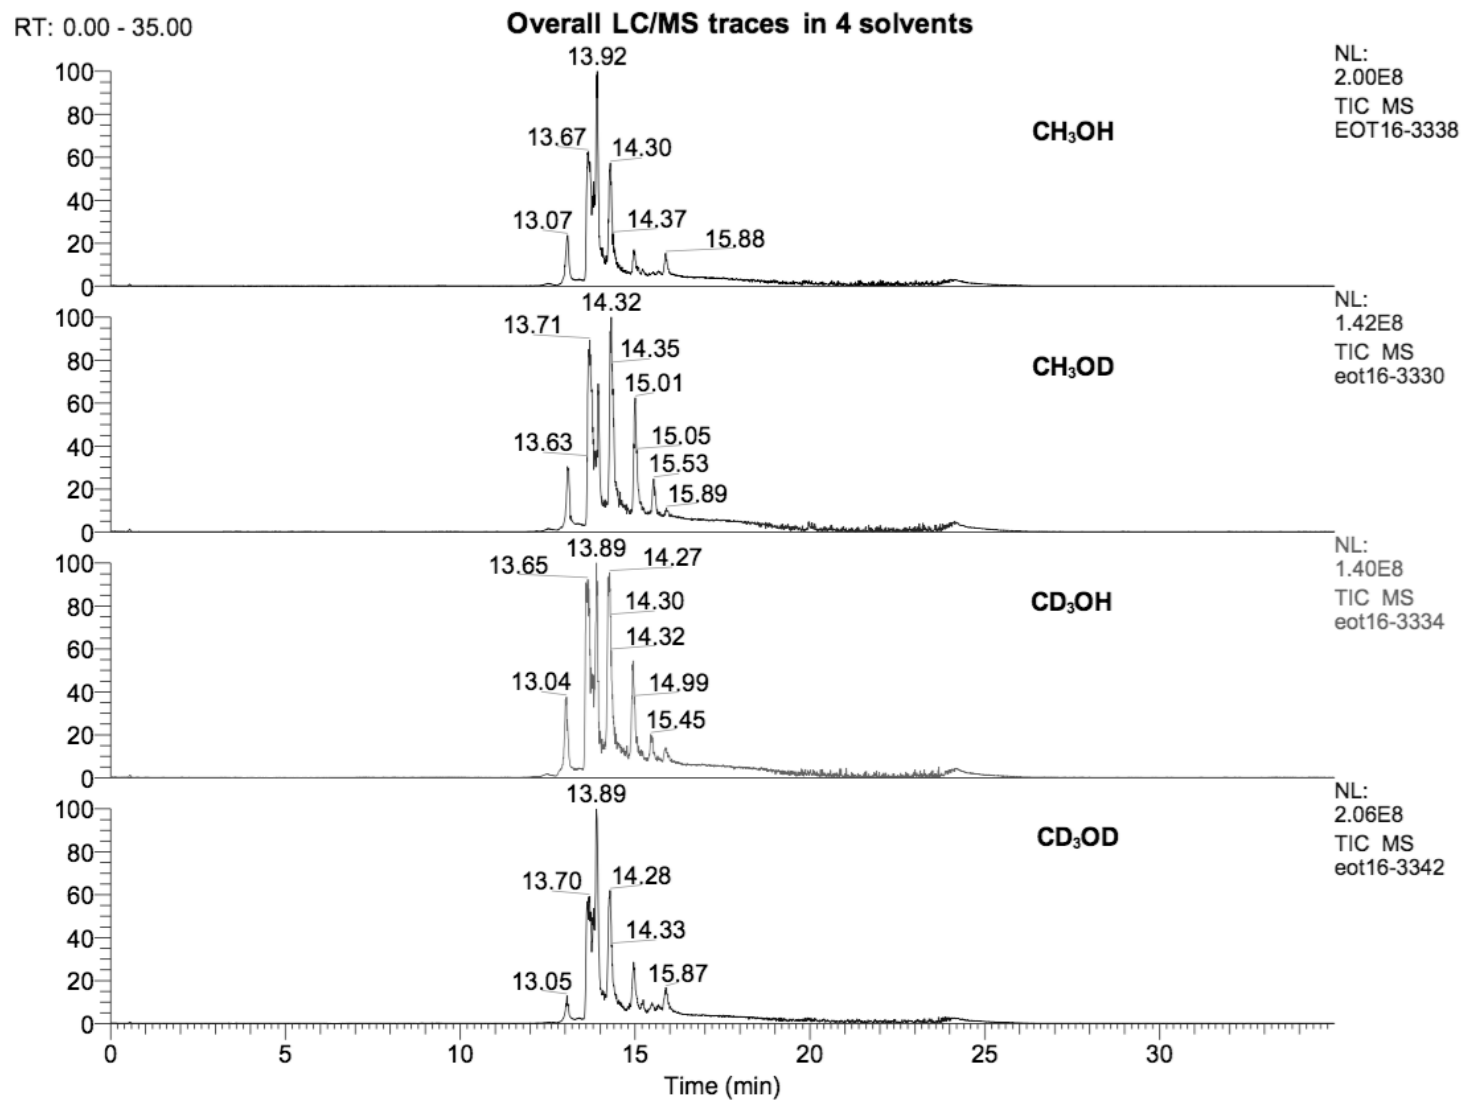

RT: 0.00 - 35.00

**Selected LC/MS traces of 4/4-d in 4 solvents**

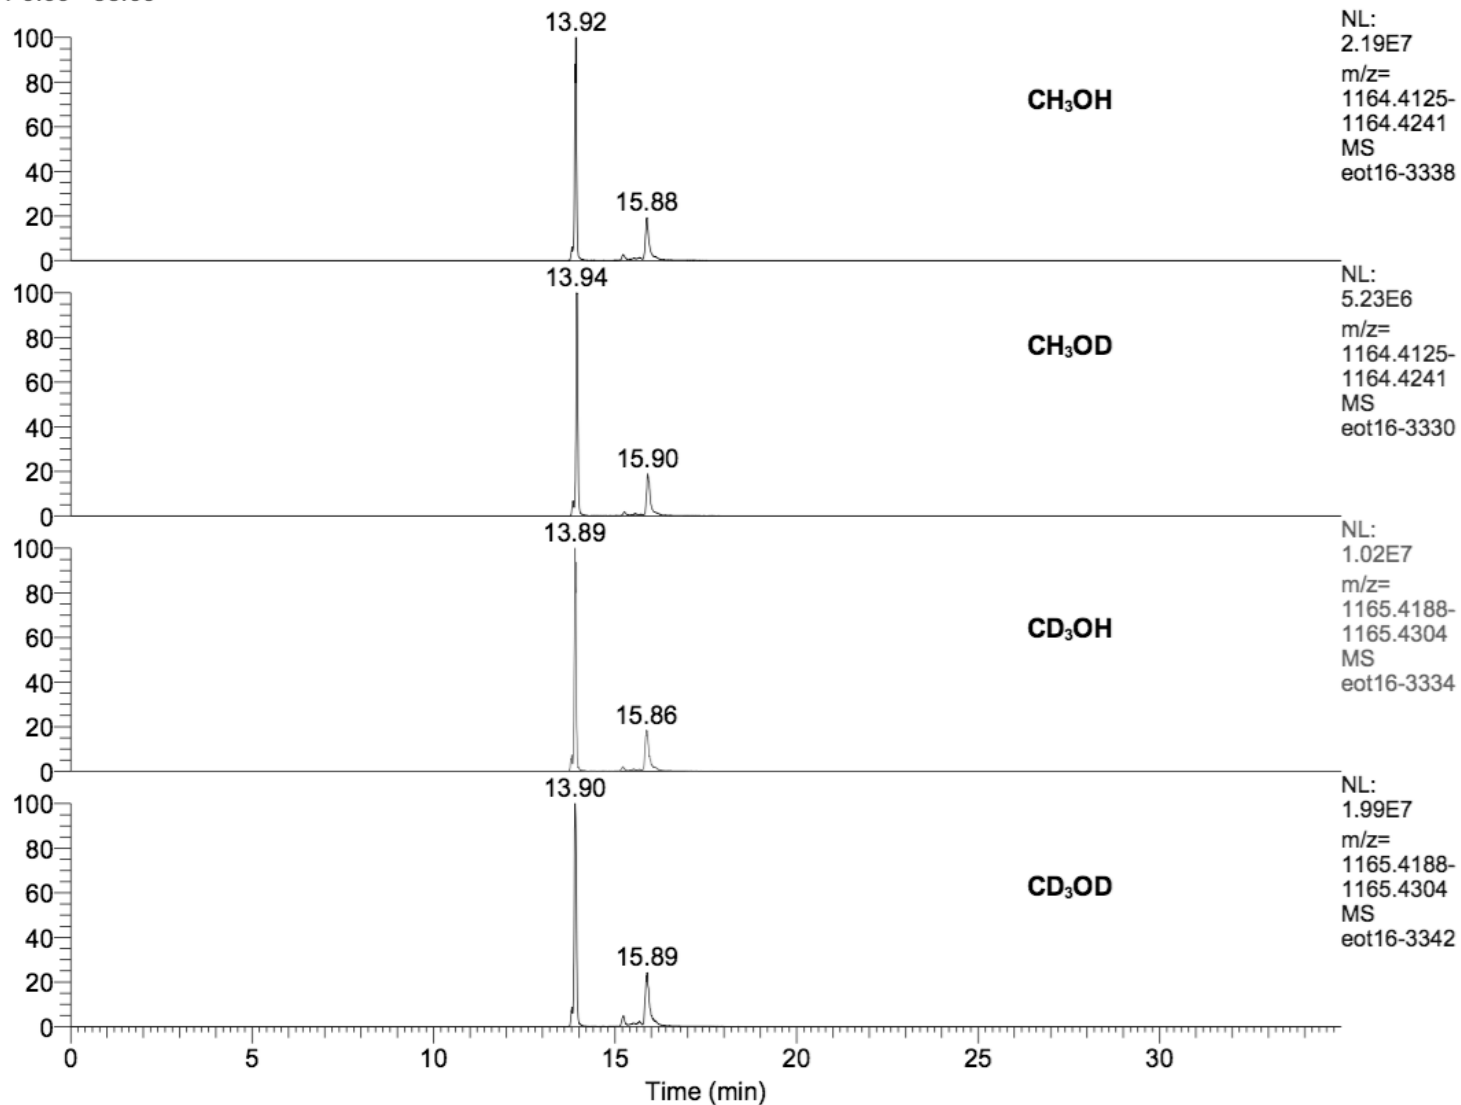

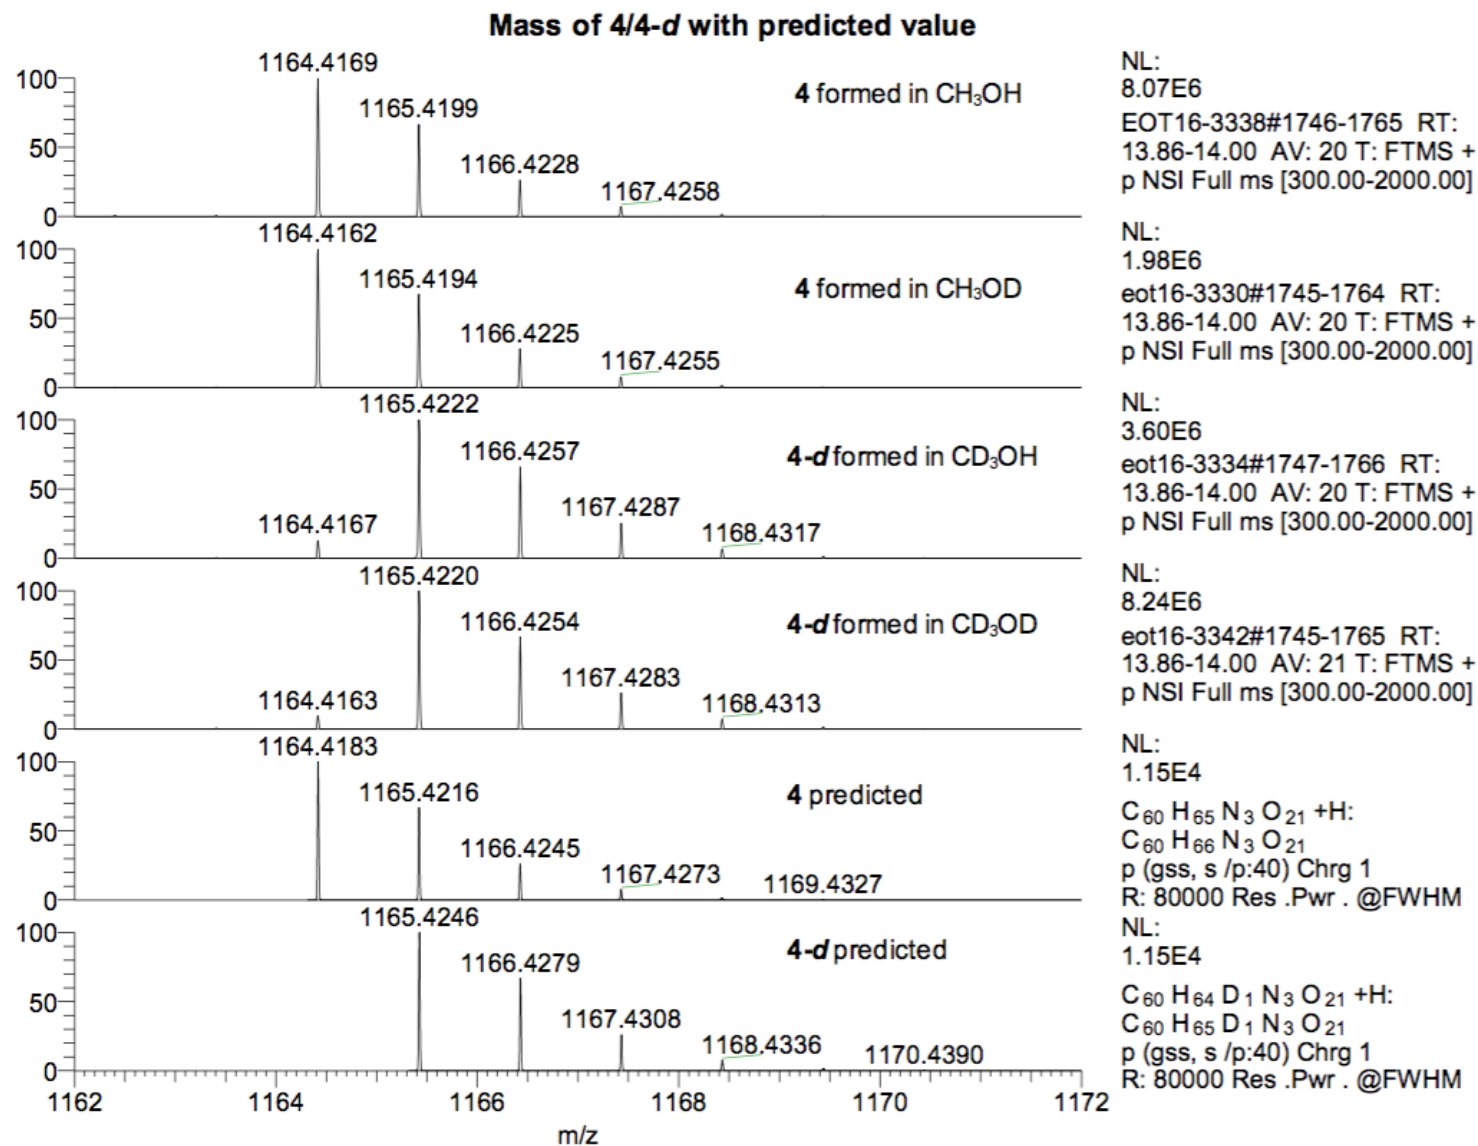

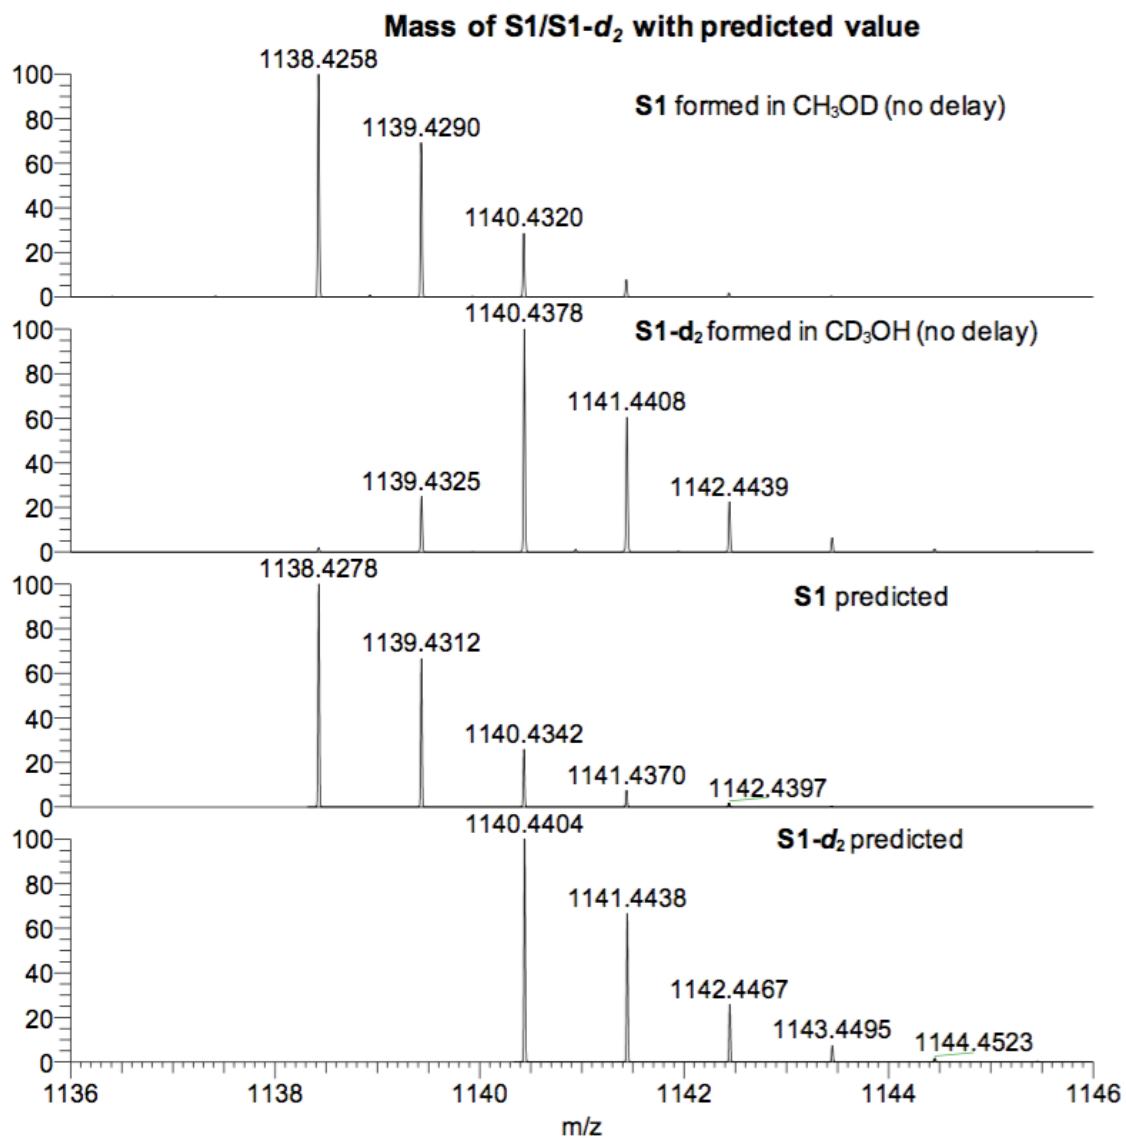

NL:  
1.85E6  
EOT16-3325#2142-2162 RT:  
16.90-17.05 AV: 21 T: FTMS  
+ p NSI Full ms  
[300.00-2000.00]

NL:  
2.40E6  
eot16-3334r#2148-2167 RT:  
16.90-17.05 AV: 20 T: FTMS  
+ p NSI Full ms  
[300.00-2000.00]

NL:  
1.16E4  
C<sub>60</sub>H<sub>67</sub>N<sub>1</sub>O<sub>21</sub>+H:  
C<sub>60</sub>H<sub>68</sub>N<sub>1</sub>O<sub>21</sub>  
p (gss, s /p:40) Chrg 1  
R: 80000 Res .Pwr . @FWHM

NL:  
1.16E4  
C<sub>60</sub>H<sub>65</sub>D<sub>2</sub>N<sub>1</sub>O<sub>21</sub>+H:  
C<sub>60</sub>H<sub>66</sub>D<sub>2</sub>N<sub>1</sub>O<sub>21</sub>  
p (gss, s /p:40) Chrg 1  
R: 80000 Res .Pwr . @FWHM

## Bibliography.

1. Still, W. C.; Kahn, M.; Mitra, A. *J. Org. Chem.* **1978**, *43*, 2923.
2. Woo, C. M.; Beizer, N. E.; Janso, J. E.; Herzon, S. B. *J. Am. Chem. Soc.* **2012**, *134*, 15285.
